# Supplementary material for: Metabolic engineering of cottonseed oil biosynthesis pathway via RNA interference
Source: PubMed Central journal article supplement (PMC5020431; doi:10.1038/srep33342), 2016-09-13
Supplement: srep33342-s1.pdf [file srep33342-s1.pdf]

## Supplementary information

### Metabolic engineering of cottonseed oil biosynthesis pathway via RNA interference

Zhongping Xu, Jingwen Li, Xiaoping Guo, Shuangxia Jin\* and Xianlong Zhang\*

National Key Laboratory of Crop Genetic Improvement, College of Plant Science and Technology, Huazhong Agricultural University, Wuhan, Hubei, 430070, China

\* Corresponding author:

Shuangxia Jin and Xianlong Zhang

Fax: +86-027-8720196;

email: [jsx@mail.hzau.edu.cn](mailto:jsx@mail.hzau.edu.cn) or [xlzhang@mail.hzau.edu.cn](mailto:xlzhang@mail.hzau.edu.cn)

Zhongping Xu ([tiramisutes@webmail.hzau.edu.cn](mailto:tiramisutes@webmail.hzau.edu.cn))

Jingwen Li ([hopes@outlook.com](mailto:hopes@outlook.com))

Xiaoping Guo ([xpguo@mail.hzau.edu.cn](mailto:xpguo@mail.hzau.edu.cn))

Shuangxia Jin ([jsx@mail.hzau.edu.cn](mailto:jsx@mail.hzau.edu.cn))

Xianlong Zhang ([xlzhang@mail.hzau.edu.cn](mailto:xlzhang@mail.hzau.edu.cn))

## SUPPLEMENTARY FIGURE LEGEND

**Fig. S1. Multiple sequence alignment of phosphoenolpyruvate carboxylase amino acid sequence from *Gossypium raimondii* genome and *Gossypium hirsutum* accession in NCBI.** GhPEPC1 (GenBank: AF008939.1) and GhPEPC2 (GenBank: EU032328.1). Conserved motifs and function domains were annotated with red underline. \*: C3 signature Ala;  $\Delta$ : Phosphorylation site and exclusively belongs to plant PEPCs.

**Fig. S2. Transmembrane helices (a) and signal peptide (b) of *G. hirsutum* phosphoenolpyruvate carboxylase 1 (*GhPEPC1*).** The predicted result showed that *GhPEPC1* might be a cytoplasmic solubility protein for non-transmembrane domains (a) and non-signal peptide (b).

**Fig. S3. Agrobacterium-mediated genetic transformation of YZ1 with *GhPEPC1* gene.**

**Fig. S4. Southern blotting analysis of transgenic plants GhPPC.** DNA Molecular Weight Marker II labeled with DIG was acted as positive control.

**Fig. S5. GC-MS from the analysis of fatty acid component for cottonseed and leaves.** (a) GC-MS profiles of a standard solution. (b) GC-MS profile of a sample, which contained a 0.2mg/ml Nonadecanoic acid internal standard.

**Fig. S6. Correlation analysis.** (a) Intercorrelations correlogram of all sample. The darker and more saturated the color, the greater the magnitude of the correlation. The upper triangle of cells displays the same information using pies. (b) Replicates Correlation Test between contrast (Null) and RNAi (PPC8) based on FPKM value.

**Fig. S7. Volcanic figure showing the differentially expressed genes (DEGs) between the transgenic lines and null plants.** The black dots represent no difference, red dots are up-regulated genes and blue dots are down regulated genes.

**Fig. S8. The line graph show *GhPEPC* genes expression level (FPKM) between null (contrast) and PPC8 (RNAi).** Only Gh\_A09G0010 (*GhPEPC1*) gene expression level was significantly lower than in the null plants (P value < 0.05).

**Fig. S9. Gene ontology analysis of DEGs.** (a) Functional classification of differentially expressed genes, according to Gene Ontology Consortium.

**Fig. S10. Pathway of carbon metabolism from KEGG metabolic pathway analysis.** Up red arrow indicated the relation genes were up-regulation in DEGs, down blue arrow were opposite.

**Fig. S11. Determination of photosynthesis.** (a)The photosynthesis of transgenic lines in different areas. (b)The photosynthesis of Campus station transgenic lines in same day, but different period (morning, noon and afternoon).

**Fig. S12. The phenotypic traits of transgenic lines and null plants.** (a) Diagram of field trial in different areas. Wuhan (China), Ezhou (China) and Campus station (China). (b) Box plot showing the plant height distribution and (c) was seed morphology for stationary 10 grains cottonseed.

**Fig. S13. The sequence length (a) and phylogenetic (b) of all DEGs.** Most of DEGs length are less than 1kb. In addition, the DEGs were split into four distinct clusters based on phylogenetic analysis showed that many DEGs had relatively close genetic relationship and possibly divided from the same gene family, even the presence of functional redundancy.

**Table S1. Summary of sequence read mapping.**

**Table S2. Primers used in this study for qRT-PCR.**

**Table S3. Chlorophyll content in transgenic lines of RNAi *GhPEPC1*.**

|                  |                                                                                                                                            |                              |      |
|------------------|--------------------------------------------------------------------------------------------------------------------------------------------|------------------------------|------|
| Gr. 002G061400.1 | ...MATRNNSKLEKLTADACLRILVPAKVEDEDKIVYVDALLERFLDILDQDLSGDELFETVQRCYELBAEYEGKSTPKLRETNVLTSDIDGGDSITVUAKAFSHMNGNLANIABEVQIAYRRR               | IKLHKGGDFADRSSAT             | 137  |
| Gr. 004G272100.1 | MASTKSN...KMQKLTADACLRILVPAKVEDEDKIVYVDALLERFLDILDQDLSGDELFETVQRCYELBAEYEGKSTPKLRETNVLTSDIDGGDSITVUAKAFSHMNGNLANIABEVQIAYRRR               | IKLHKGGDFADRSSAT             | 137  |
| Gr. 006G001300.1 | MAGR...KVERMASTADACLRILVPAKVEDEDKIVYVDALLERFLDILDQDLSGDELFETVQRCYELBAEYEGKSTPKLRETNVLTSDIDGGDSITVUAKAFSHMNGNLANIABEVQIAYRRR                | IKLHKGGDFADRSSAT             | 137  |
| Gr. 008G095300.1 | MAGR...KVERITSTADACLRILVPAKVEDEDKIVYVDALLERFLDILDQDLSGDELFETVQRCYELBAEYEGKSTPKLRETNVLTSDIDGGDSITVUAKAFSHMNGNLANIABEVQIAYRRR                | IKLHKGGDFADRSSAT             | 133  |
| Gr. 008G187900.2 | ...MPEPTTDETABETIIFCPGFEDPKLQKLLDDVDEGRMSACPMKATRETLALASQMLATSTREKREKLLAASEREMTLEAELKAFASSTPKLRETNVLTSDIDGGDSITVUAKAFSHMNGNLANIABEVQIAYRRR | IKLHKGGDFADRSSAT             | 113  |
| Gr. 013G173500.1 | MASFNNNNNGKFEKLTADACLRILVPAKVEDEDKIVYVDALLERFLDILDQDLSGDELFETVQRCYELBAEYEGKSTPKLRETNVLTSDIDGGDSITVUAKAFSHMNGNLANIABEVQIAYRRR               | IKLHKGGDFADRSSAT             | 139  |
| Gr. 013G173500.2 | MASFNNNNNGKFEKLTADACLRILVPAKVEDEDKIVYVDALLERFLDILDQDLSGDELFETVQRCYELBAEYEGKSTPKLRETNVLTSDIDGGDSITVUAKAFSHMNGNLANIABEVQIAYRRR               | IKLHKGGDFADRSSAT             | 139  |
| Gr. 013G173500.1 | MASFNNNNNGKFEKLTADACLRILVPAKVEDEDKIVYVDALLERFLDILDQDLSGDELFETVQRCYELBAEYEGKSTPKLRETNVLTSDIDGGDSITVUAKAFSHMNGNLANIABEVQIAYRRR               | IKLHKGGDFADRSSAT             | 139  |
| Gr. 013G173500.2 | MASFNNNNNGKFEKLTADACLRILVPAKVEDEDKIVYVDALLERFLDILDQDLSGDELFETVQRCYELBAEYEGKSTPKLRETNVLTSDIDGGDSITVUAKAFSHMNGNLANIABEVQIAYRRR               | IKLHKGGDFADRSSAT             | 139  |
| Gr. 013G173500.1 | MAGR...KVERMASTADACLRILVPAKVEDEDKIVYVDALLERFLDILDQDLSGDELFETVQRCYELBAEYEGKSTPKLRETNVLTSDIDGGDSITVUAKAFSHMNGNLANIABEVQIAYRRR                | IKLHKGGDFADRSSAT             | 133  |
| Gr. 013G173500.2 | MAGR...KVERMASTADACLRILVPAKVEDEDKIVYVDALLERFLDILDQDLSGDELFETVQRCYELBAEYEGKSTPKLRETNVLTSDIDGGDSITVUAKAFSHMNGNLANIABEVQIAYRRR                | IKLHKGGDFADRSSAT             | 138  |
| Gr. 002G061400.1 | TESDIETLTKRLVLELKKSEEFVDALKNCTVDLVTAHPFCSPVRRDLQRHGRIRNCLAQYLYGDIIPDDKQEDIDALQCEIICAAFRTEIRNRTPETQODBMRGMSYFHEIWKVQPKLRRVITAIKNGINEKRV     | IKLHKGGDFADRSSAT             | 277  |
| Gr. 004G272100.1 | TESDIETLTKRLVLELKKSEEFVDALKNCTVDLVTAHPFCSPVRRDLQRHGRIRNCLAQYLYGDIIPDDKQEDIDALQCEIICAAFRTEIRNRTPETQODBMRGMSYFHEIWKVQPKLRRVITAIKNGINEKRV     | IKLHKGGDFADRSSAT             | 277  |
| Gr. 006G001300.1 | TESDIETLTKRLVLELKKSEEFVDALKNCTVDLVTAHPFCSPVRRDLQRHGRIRNCLAQYLYGDIIPDDKQEDIDALQCEIICAAFRTEIRNRTPETQODBMRGMSYFHEIWKVQPKLRRVITAIKNGINEKRV     | IKLHKGGDFADRSSAT             | 277  |
| Gr. 008G095300.1 | TESDIETLTKRLVLELKKSEEFVDALKNCTVDLVTAHPFCSPVRRDLQRHGRIRNCLAQYLYGDIIPDDKQEDIDALQCEIICAAFRTEIRNRTPETQODBMRGMSYFHEIWKVQPKLRRVITAIKNGINEKRV     | IKLHKGGDFADRSSAT             | 273  |
| Gr. 008G187900.1 | HLKSCDDDFSLICGGVVTNDLYVTVCKBUVETVAHPFCINPRDLQYHRIHLHLVNDRDLGHGRRKIDLVLRVETSLVQCFEIRNRTPETQODBMRGMSYFHEIWKVQPKLRRVITAIKNGINEKRV             | IKLHKGGDFADRSSAT             | 216  |
| Gr. 013G173500.1 | TESDIETLTKRLVLELKKSEEFVDALKNCTVDLVTAHPFCSPVRRDLQRHGRIRNCLAQYLYGDIIPDDKQEDIDALQCEIICAAFRTEIRNRTPETQODBMRGMSYFHEIWKVQPKLRRVITAIKNGINEKRV     | IKLHKGGDFADRSSAT             | 279  |
| Gr. 013G173500.2 | TESDIETLTKRLVLELKKSEEFVDALKNCTVDLVTAHPFCSPVRRDLQRHGRIRNCLAQYLYGDIIPDDKQEDIDALQCEIICAAFRTEIRNRTPETQODBMRGMSYFHEIWKVQPKLRRVITAIKNGINEKRV     | IKLHKGGDFADRSSAT             | 279  |
| Gr. 013G173500.1 | TESDIETLTKRLVLELKKSEEFVDALKNCTVDLVTAHPFCSPVRRDLQRHGRIRNCLAQYLYGDIIPDDKQEDIDALQCEIICAAFRTEIRNRTPETQODBMRGMSYFHEIWKVQPKLRRVITAIKNGINEKRV     | IKLHKGGDFADRSSAT             | 279  |
| Gr. 013G173500.2 | TESDIETLTKRLVLELKKSEEFVDALKNCTVDLVTAHPFCSPVRRDLQRHGRIRNCLAQYLYGDIIPDDKQEDIDALQCEIICAAFRTEIRNRTPETQODBMRGMSYFHEIWKVQPKLRRVITAIKNGINEKRV     | IKLHKGGDFADRSSAT             | 273  |
| Gr. 013G173500.1 | TESDIETLTKRLVLELKKSEEFVDALKNCTVDLVTAHPFCSPVRRDLQRHGRIRNCLAQYLYGDIIPDDKQEDIDALQCEIICAAFRTEIRNRTPETQODBMRGMSYFHEIWKVQPKLRRVITAIKNGINEKRV     | IKLHKGGDFADRSSAT             | 278  |
| Gr. 002G061400.1 | NADLITCPSMMGGDPDGNRVTPEVTRDVLRRMAANDLYSGCEDDMPFLSMMRCSDDLRR                                                                                | VRADSHRSEARDAKHYYIEFWKQVFENE | 367  |
| Gr. 004G272100.1 | NADLITCPSMMGGDPDGNRVTPEVTRDVLRRMAANDLYSGCEDDMPFLSMMRCSDDLRR                                                                                | VRADSHRSEARDAKHYYIEFWKQVFENE | 367  |
| Gr. 006G001300.1 | NADLITCPSMMGGDPDGNRVTPEVTRDVLRRMAANDLYSGCEDDMPFLSMMRCSDDLRR                                                                                | VRADSHRSEARDAKHYYIEFWKQVFENE | 367  |
| Gr. 008G095300.1 | NADLITCPSMMGGDPDGNRVTPEVTRDVLRRMAANDLYSGCEDDMPFLSMMRCSDDLRR                                                                                | VRADSHRSEARDAKHYYIEFWKQVFENE | 363  |
| Gr. 008G187900.1 | TCTDILHPSMMGGDPDGNRVTPEVTRDVLRRMAANDLYSGCEDDMPFLSMMRCSDDLRR                                                                                | VRADSHRSEARDAKHYYIEFWKQVFENE | 294  |
| Gr. 008G187900.2 | TCTDILHPSMMGGDPDGNRVTPEVTRDVLRRMAANDLYSGCEDDMPFLSMMRCSDDLRR                                                                                | VRADSHRSEARDAKHYYIEFWKQVFENE | 356  |
| Gr. 013G173500.1 | NADLITCPSMMGGDPDGNRVTPEVTRDVLRRMAANDLYSGCEDDMPFLSMMRCSDDLRR                                                                                | VRADSHRSEARDAKHYYIEFWKQVFENE | 369  |
| Gr. 013G173500.2 | NADLITCPSMMGGDPDGNRVTPEVTRDVLRRMAANDLYSGCEDDMPFLSMMRCSDDLRR                                                                                | VRADSHRSEARDAKHYYIEFWKQVFENE | 369  |
| Gr. 013G173500.1 | NADLITCPSMMGGDPDGNRVTPEVTRDVLRRMAANDLYSGCEDDMPFLSMMRCSDDLRR                                                                                | VRADSHRSEARDAKHYYIEFWKQVFENE | 369  |
| Gr. 013G173500.2 | NADLITCPSMMGGDPDGNRVTPEVTRDVLRRMAANDLYSGCEDDMPFLSMMRCSDDLRR                                                                                | VRADSHRSEARDAKHYYIEFWKQVFENE | 363  |
| Gr. 013G173500.1 | NADLITCPSMMGGDPDGNRVTPEVTRDVLRRMAANDLYSGCEDDMPFLSMMRCSDDLRR                                                                                | VRADSHRSEARDAKHYYIEFWKQVFENE | 369  |
| Gr. 002G061400.1 | .....                                                                                                                                      | .....                        | 431  |
| Gr. 004G272100.1 | .....                                                                                                                                      | .....                        | 431  |
| Gr. 006G001300.1 | .....                                                                                                                                      | .....                        | 431  |
| Gr. 008G095300.1 | .....                                                                                                                                      | .....                        | 427  |
| Gr. 008G187900.1 | DGRNESKDLSPNIEKLSANGSANSNGSSTA VTSGFSQSLIAQRKLFESTIGRSFHKLEPSSALRPGIA                                                                      | .....                        | 534  |
| Gr. 008G187900.2 | DGRNESKDLSPNIEKLSANGSANSNGSSTA VTSGFSQSLIAQRKLFESTIGRSFHKLEPSSALRPGIA                                                                      | .....                        | 496  |
| Gr. 013G173500.1 | .....                                                                                                                                      | .....                        | 433  |
| Gr. 013G173500.2 | .....                                                                                                                                      | .....                        | 433  |
| Gr. 013G173500.1 | .....                                                                                                                                      | .....                        | 433  |
| Gr. 013G173500.2 | .....                                                                                                                                      | .....                        | 433  |
| Gr. 013G173500.1 | .....                                                                                                                                      | .....                        | 437  |
| Gr. 013G173500.2 | .....                                                                                                                                      | .....                        | 437  |
| Gr. 002G061400.1 | ESLDDFIRVVFPECSVRLDRCESERHHDVDAITKHLDTGSEYRBEDEKEMWLSLSESRAPLPGDLDPKKTEADLDIFPULAEIDANENGANTI                                              | SMARSDVLAVELLCRECHVKQ        | 560  |
| Gr. 004G272100.1 | ESLDDFIRVVFPECSVRLDRCESERHHDVDAITKHLDTGSEYRBEDEKEMWLSLSESRAPLPGDLDPKKTEADLDIFPULAEIDANENGANTI                                              | SMARSDVLAVELLCRECHVKQ        | 560  |
| Gr. 006G001300.1 | ESLDDFIRVVFPECSVRLDRCESERHHDVDAITKHLDTGSEYRBEDEKEMWLSLSESRAPLPGDLDPKKTEADLDIFPULAEIDANENGANTI                                              | SMARSDVLAVELLCRECHVKQ        | 560  |
| Gr. 008G095300.1 | ESLDDFIRVVFPECSVRLDRCESERHHDVDAITKHLDTGSEYRBEDEKEMWLSLSESRAPLPGDLDPKKTEADLDIFPULAEIDANENGANTI                                              | SMARSDVLAVELLCRECHVKQ        | 556  |
| Gr. 008G187900.1 | ESLDDFIRVVFPECSVRLDRCESERHHDVDAITKHLDTGSEYRBEDEKEMWLSLSESRAPLPGDLDPKKTEADLDIFPULAEIDANENGANTI                                              | SMARSDVLAVELLCRECHVKQ        | 562  |
| Gr. 008G187900.2 | ESLDDFIRVVFPECSVRLDRCESERHHDVDAITKHLDTGSEYRBEDEKEMWLSLSESRAPLPGDLDPKKTEADLDIFPULAEIDANENGANTI                                              | SMARSDVLAVELLCRECHVKQ        | 562  |
| Gr. 013G173500.1 | ESLDDFIRVVFPECSVRLDRCESERHHDVDAITKHLDTGSEYRBEDEKEMWLSLSESRAPLPGDLDPKKTEADLDIFPULAEIDANENGANTI                                              | SMARSDVLAVELLCRECHVKQ        | 562  |
| Gr. 013G173500.2 | ESLDDFIRVVFPECSVRLDRCESERHHDVDAITKHLDTGSEYRBEDEKEMWLSLSESRAPLPGDLDPKKTEADLDIFPULAEIDANENGANTI                                              | SMARSDVLAVELLCRECHVKQ        | 562  |
| Gr. 013G173500.1 | ESLDDFIRVVFPECSVRLDRCESERHHDVDAITKHLDTGSEYRBEDEKEMWLSLSESRAPLPGDLDPKKTEADLDIFPULAEIDANENGANTI                                              | SMARSDVLAVELLCRECHVKQ        | 562  |
| Gr. 013G173500.2 | ESLDDFIRVVFPECSVRLDRCESERHHDVDAITKHLDTGSEYRBEDEKEMWLSLSESRAPLPGDLDPKKTEADLDIFPULAEIDANENGANTI                                              | SMARSDVLAVELLCRECHVKQ        | 562  |
| Gr. 013G173500.1 | ESLDDFIRVVFPECSVRLDRCESERHHDVDAITKHLDTGSEYRBEDEKEMWLSLSESRAPLPGDLDPKKTEADLDIFPULAEIDANENGANTI                                              | SMARSDVLAVELLCRECHVKQ        | 562  |
| Gr. 013G173500.2 | ESLDDFIRVVFPECSVRLDRCESERHHDVDAITKHLDTGSEYRBEDEKEMWLSLSESRAPLPGDLDPKKTEADLDIFPULAEIDANENGANTI                                              | SMARSDVLAVELLCRECHVKQ        | 562  |
| Gr. 002G061400.1 | ELFEKLIADTEAFAALARLSLDWYRNNIRL...GSCQVMGGYSEISGKDAARLSAACDLKACCELLIVAKVCGVLDMPFHGRGGVVGAGGGPHLAIISQPPETIIGSSIRVTVQGVETIQSGEHLCFRTLQRFRAA   | IKLHKGGDFADRSSAT             | 696  |
| Gr. 004G272100.1 | ELFEKLIADTEAFAALARLSLDWYRNNIRL...GSCQVMGGYSEISGKDAARLSAACDLKACCELLIVAKVCGVLDMPFHGRGGVVGAGGGPHLAIISQPPETIIGSSIRVTVQGVETIQSGEHLCFRTLQRFRAA   | IKLHKGGDFADRSSAT             | 696  |
| Gr. 006G001300.1 | ELFEKLIADTEAFAALARLSLDWYRNNIRL...GSCQVMGGYSEISGKDAARLSAACDLKACCELLIVAKVCGVLDMPFHGRGGVVGAGGGPHLAIISQPPETIIGSSIRVTVQGVETIQSGEHLCFRTLQRFRAA   | IKLHKGGDFADRSSAT             | 696  |
| Gr. 008G095300.1 | ELFEKLIADTEAFAALARLSLDWYRNNIRL...GSCQVMGGYSEISGKDAARLSAACDLKACCELLIVAKVCGVLDMPFHGRGGVVGAGGGPHLAIISQPPETIIGSSIRVTVQGVETIQSGEHLCFRTLQRFRAA   | IKLHKGGDFADRSSAT             | 692  |
| Gr. 008G187900.1 | ELFEKLIADTEAFAALARLSLDWYRNNIRL...GSCQVMGGYSEISGKDAARLSAACDLKACCELLIVAKVCGVLDMPFHGRGGVVGAGGGPHLAIISQPPETIIGSSIRVTVQGVETIQSGEHLCFRTLQRFRAA   | IKLHKGGDFADRSSAT             | 776  |
| Gr. 008G187900.2 | ELFEKLIADTEAFAALARLSLDWYRNNIRL...GSCQVMGGYSEISGKDAARLSAACDLKACCELLIVAKVCGVLDMPFHGRGGVVGAGGGPHLAIISQPPETIIGSSIRVTVQGVETIQSGEHLCFRTLQRFRAA   | IKLHKGGDFADRSSAT             | 698  |
| Gr. 013G173500.1 | ELFEKLIADTEAFAALARLSLDWYRNNIRL...GSCQVMGGYSEISGKDAARLSAACDLKACCELLIVAKVCGVLDMPFHGRGGVVGAGGGPHLAIISQPPETIIGSSIRVTVQGVETIQSGEHLCFRTLQRFRAA   | IKLHKGGDFADRSSAT             | 698  |
| Gr. 013G173500.2 | ELFEKLIADTEAFAALARLSLDWYRNNIRL...GSCQVMGGYSEISGKDAARLSAACDLKACCELLIVAKVCGVLDMPFHGRGGVVGAGGGPHLAIISQPPETIIGSSIRVTVQGVETIQSGEHLCFRTLQRFRAA   | IKLHKGGDFADRSSAT             | 698  |
| Gr. 013G173500.1 | ELFEKLIADTEAFAALARLSLDWYRNNIRL...GSCQVMGGYSEISGKDAARLSAACDLKACCELLIVAKVCGVLDMPFHGRGGVVGAGGGPHLAIISQPPETIIGSSIRVTVQGVETIQSGEHLCFRTLQRFRAA   | IKLHKGGDFADRSSAT             | 692  |
| Gr. 013G173500.2 | ELFEKLIADTEAFAALARLSLDWYRNNIRL...GSCQVMGGYSEISGKDAARLSAACDLKACCELLIVAKVCGVLDMPFHGRGGVVGAGGGPHLAIISQPPETIIGSSIRVTVQGVETIQSGEHLCFRTLQRFRAA   | IKLHKGGDFADRSSAT             | 698  |
| Gr. 002G061400.1 | LEHGMIPFVSRKPE.MRALNDENAVATEEYRLEVPKPRVVEYFLATPELEYGRMNIGSRRKRSFGGIESIRAIPFWLIMTQTRFELVWLVLGFAAFKHAIQKDKNLMLQEMYNWDFPFRVTDLEVMVFAKGD       | IKLHKGGDFADRSSAT             | 835  |
| Gr. 004G272100.1 | LEHGMIPFVSRKPE.MRALNDENAVATEEYRLEVPKPRVVEYFLATPELEYGRMNIGSRRKRSFGGIESIRAIPFWLIMTQTRFELVWLVLGFAAFKHAIQKDKNLMLQEMYNWDFPFRVTDLEVMVFAKGD       | IKLHKGGDFADRSSAT             | 835  |
| Gr. 006G001300.1 | LEHGMIPFVSRKPE.MRALNDENAVATEEYRLEVPKPRVVEYFLATPELEYGRMNIGSRRKRSFGGIESIRAIPFWLIMTQTRFELVWLVLGFAAFKHAIQKDKNLMLQEMYNWDFPFRVTDLEVMVFAKGD       | IKLHKGGDFADRSSAT             | 751  |
| Gr. 008G095300.1 | LEHGMIPFVSRKPE.MRALNDENAVATEEYRLEVPKPRVVEYFLATPELEYGRMNIGSRRKRSFGGIESIRAIPFWLIMTQTRFELVWLVLGFAAFKHAIQKDKNLMLQEMYNWDFPFRVTDLEVMVFAKGD       | IKLHKGGDFADRSSAT             | 831  |
| Gr. 008G187900.1 | ELATLLEPCFPERQHNENLNEBISKISQCNVRYVENNEBIAVQEAIPCAELGYLNIISRETRKATGIGHIRADPWLEIMTQTRFELVWLVLGFAAFKHAIQKDKNLMLQEMYNWDFPFRVTDLEVMVFAKGD       | IKLHKGGDFADRSSAT             | 952  |
| Gr. 008G187900.2 | ELATLLEPCFPERQHNENLNEBISKISQCNVRYVENNEBIAVQEAIPCAELGYLNIISRETRKATGIGHIRADPWLEIMTQTRFELVWLVLGFAAFKHAIQKDKNLMLQEMYNWDFPFRVTDLEVMVFAKGD       | IKLHKGGDFADRSSAT             | 914  |
| Gr. 013G173500.1 | LEHGMIPFVSRKPE.MRALNDENAVATEEYRLEVPKPRVVEYFLATPELEYGRMNIGSRRKRSFGGIESIRAIPFWLIMTQTRFELVWLVLGFAAFKHAIQKDKNLMLQEMYNWDFPFRVTDLEVMVFAKGD       | IKLHKGGDFADRSSAT             | 837  |
| Gr. 013G173500.2 | LEHGMIPFVSRKPE.MRALNDENAVATEEYRLEVPKPRVVEYFLATPELEYGRMNIGSRRKRSFGGIESIRAIPFWLIMTQTRFELVWLVLGFAAFKHAIQKDKNLMLQEMYNWDFPFRVTDLEVMVFAKGD       | IKLHKGGDFADRSSAT             | 837  |
| Gr. 002G061400.1 | PGLAAYDKLLVSEELNMFGERLRTNFEIKSLLCIAGHKHDLLEGDFYLKQRLRLDASITTLVNCQAYTERKRIRDENVYKLRPHISPEIMBSEKPADELUVKINPTESEYAFGLEDTLILTMKGTAAGMONTG      | IKLHKGGDFADRSSAT             | 969  |
| Gr. 004G272100.1 | PGLAAYDKLLVSEELNMFGERLRTNFEIKSLLCIAGHKHDLLEGDFYLKQRLRLDASITTLVNCQAYTERKRIRDENVYKLRPHISPEIMBSEKPADELUVKINPTESEYAFGLEDTLILTMKGTAAGMONTG      | IKLHKGGDFADRSSAT             | 969  |
| Gr. 006G001300.1 | PGLAAYDKLLVSEELNMFGERLRTNFEIKSLLCIAGHKHDLLEGDFYLKQRLRLDASITTLVNCQAYTERKRIRDENVYKLRPHISPEIMBSEKPADELUVKINPTESEYAFGLEDTLILTMKGTAAGMONTG      | IKLHKGGDFADRSSAT             | 965  |
| Gr. 008G095300.1 | PGLAAYDKLLVSEELNMFGERLRTNFEIKSLLCIAGHKHDLLEGDFYLKQRLRLDASITTLVNCQAYTERKRIRDENVYKLRPHISPEIMBSEKPADELUVKINPTESEYAFGLEDTLILTMKGTAAGMONTG      | IKLHKGGDFADRSSAT             | 969  |
| Gr. 008G187900.1 | IPLAKIVDRLVSEERNEGAEIRREINMKEKVVIVVSHPEKLEFNKLEKRELSLIPMLNMHQUVBLRIRDDENKIRL.....KPADELUVKINPTESEYAFGLEDTLILTMKGTAAGMONTG                  | IKLHKGGDFADRSSAT             | 1017 |
| Gr. 008G187900.2 | PGLAAYDKLLVSEELNMFGERLRTNFEIKSLLCIAGHKHDLLEGDFYLKQRLRLDASITTLVNCQAYTERKRIRDENVYKLRPHISPEIMBSEKPADELUVKINPTESEYAFGLEDTLILTMKGTAAGMONTG      | IKLHKGGDFADRSSAT             | 964  |
| Gr. 013G173500.1 | PGLAAYDKLLVSEELNMFGERLRTNFEIKSLLCIAGHKHDLLEGDFYLKQRLRLDASITTLVNCQAYTERKRIRDENVYKLRPHISPEIMBSEKPADELUVKINPTESEYAFGLEDTLILTMKGTAAGMONTG      | IKLHKGGDFADRSSAT             | 970  |
| Gr. 013G173500.2 | PGLAAYDKLLVSEELNMFGERLRTNFEIKSLLCIAGHKHDLLEGDFYLKQRLRLDASITTLVNCQAYTERKRIRDENVYKLRPHISPEIMBSEKPADELUVKINPTESEYAFGLEDTLILTMKGTAAGMONTG      | IKLHKGGDFADRSSAT             | 971  |
| Gr. 013G173500.1 | PGLAAYDKLLVSEELNMFGERLRTNFEIKSLLCIAGHKHDLLEGDFYLKQRLRLDASITTLVNCQAYTERKRIRDENVYKLRPHISPEIMBSEKPADELUVKINPTESEYAFGLEDTLILTMKGTAAGMONTG      | IKLHKGGDFADRSSAT             | 965  |
| Gr. 013G173500.2 | PGLAAYDKLLVSEELNMFGERLRTNFEIKSLLCIAGHKHDLLEGDFYLKQRLRLDASITTLVNCQAYTERKRIRDENVYKLRPHISPEIMBSEKPADELUVKINPTESEYAFGLEDTLILTMKGTAAGMONTG      | IKLHKGGDFADRSSAT             | 970  |

Fig. S1.

loop IV regulatory function conserved motif II for catalytic activity



**a**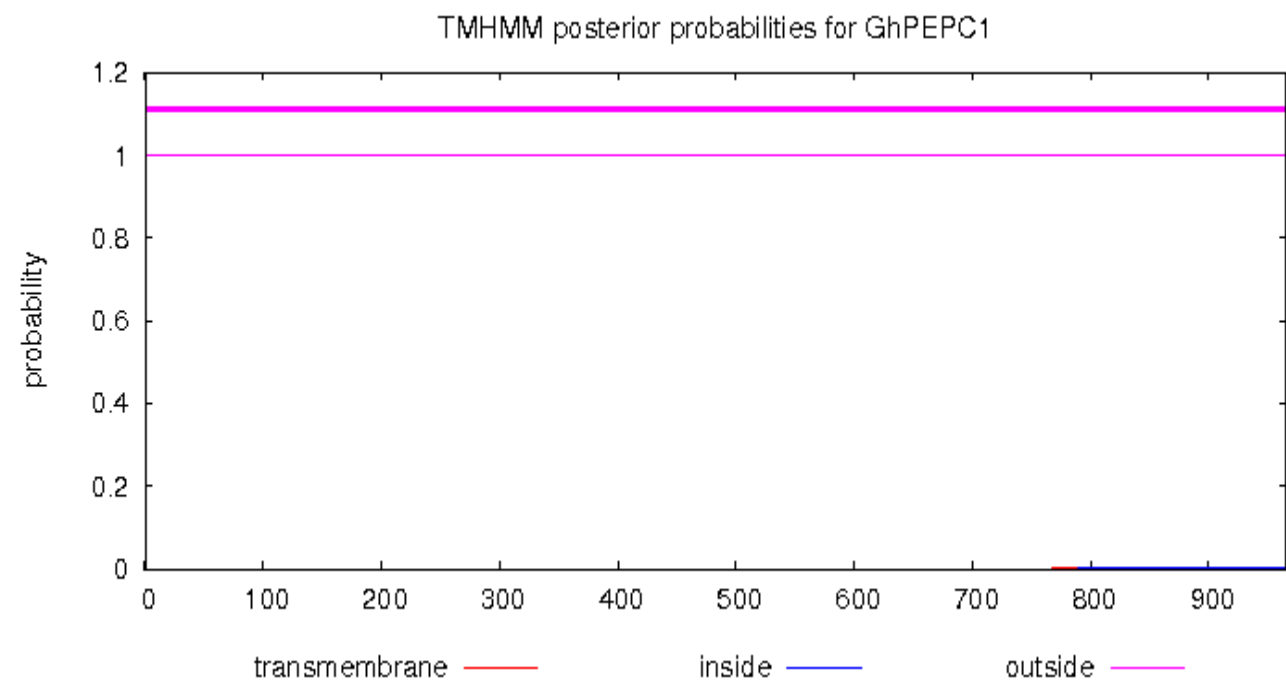**b**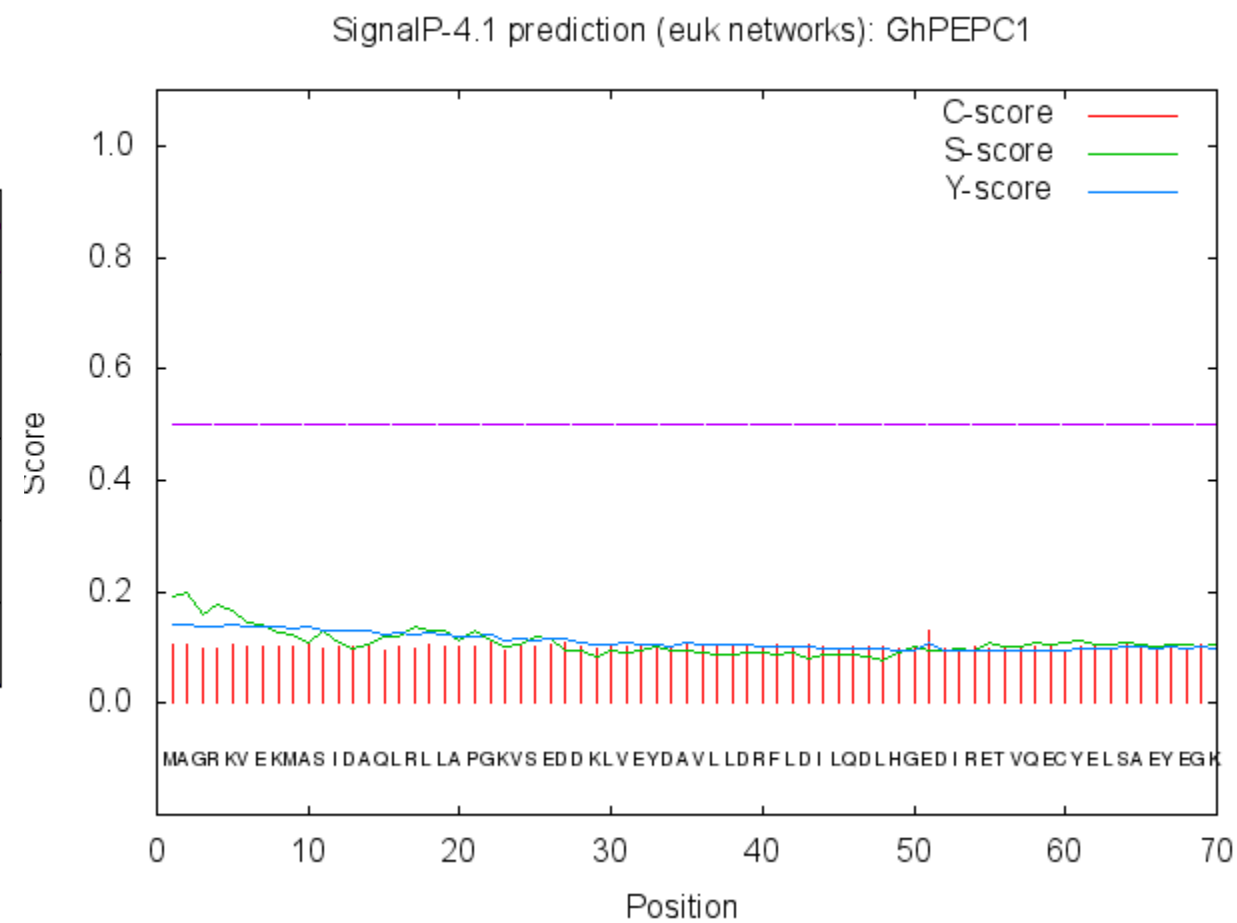

Fig. S2.

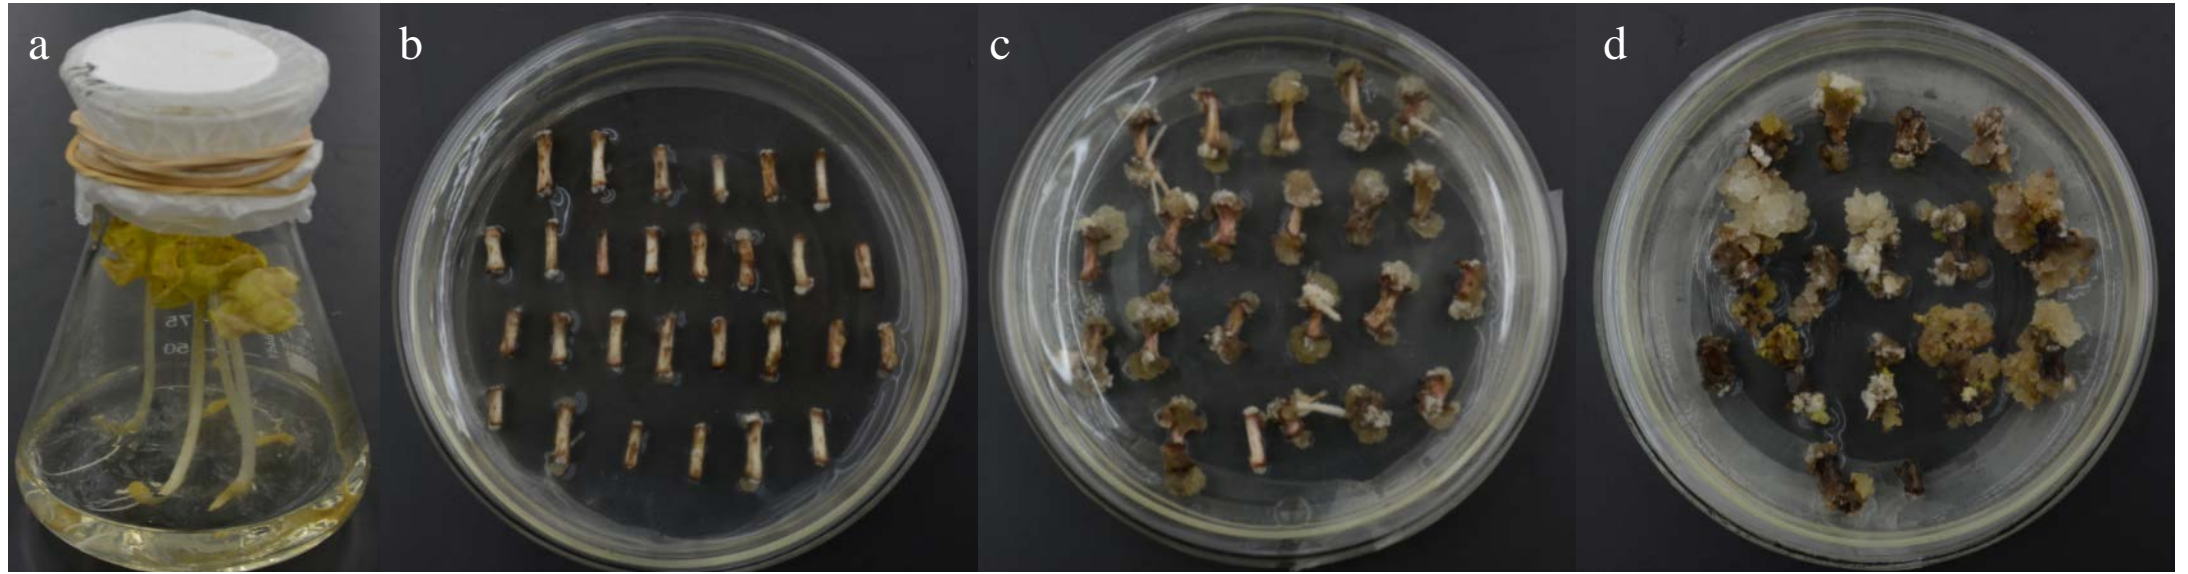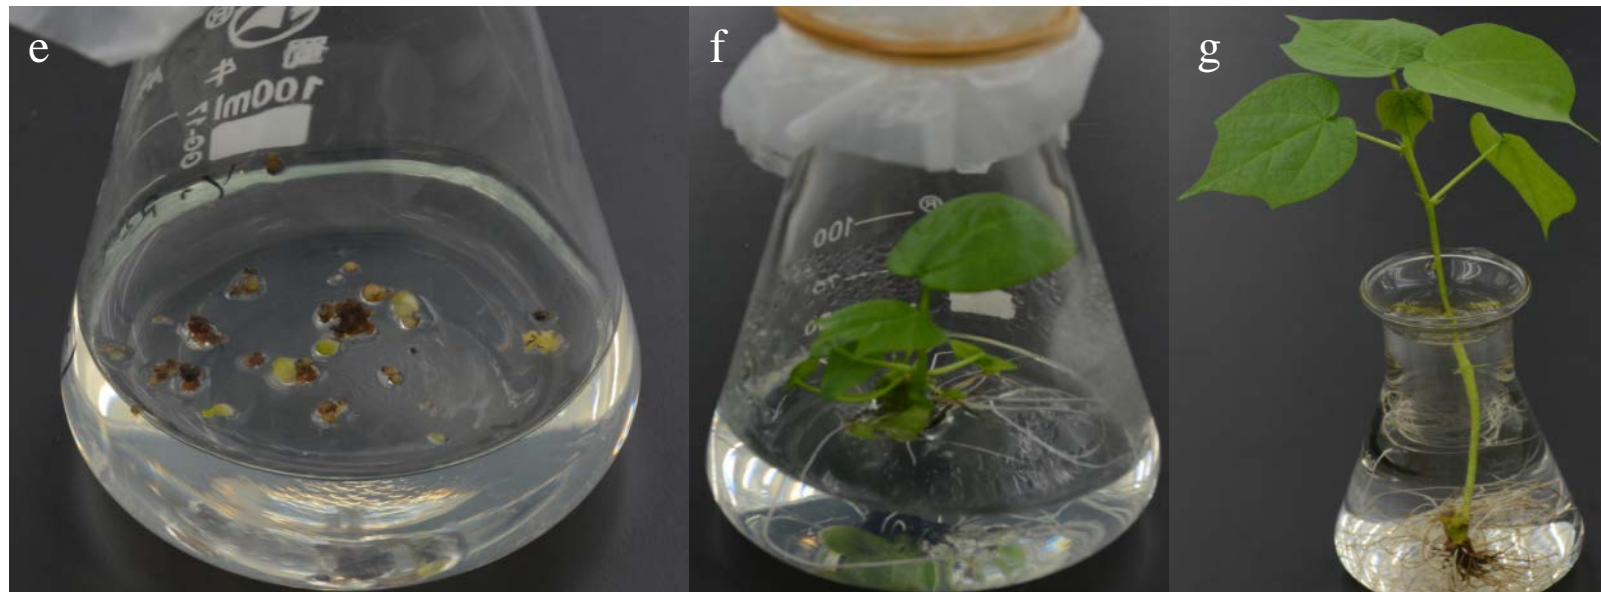

Fig. S3.

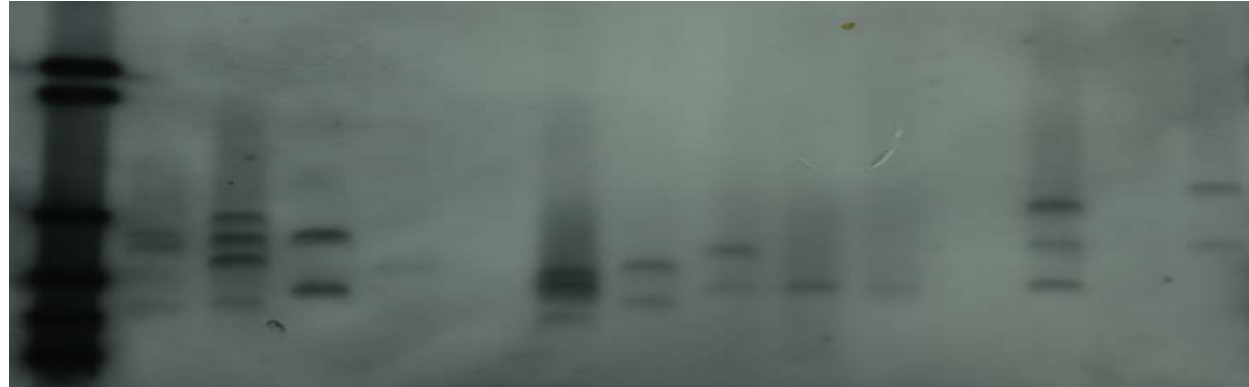

GhPPC M 18 16 32 25 4 3 33 1 8 2 5 20 10 23

Fig. S4.

a

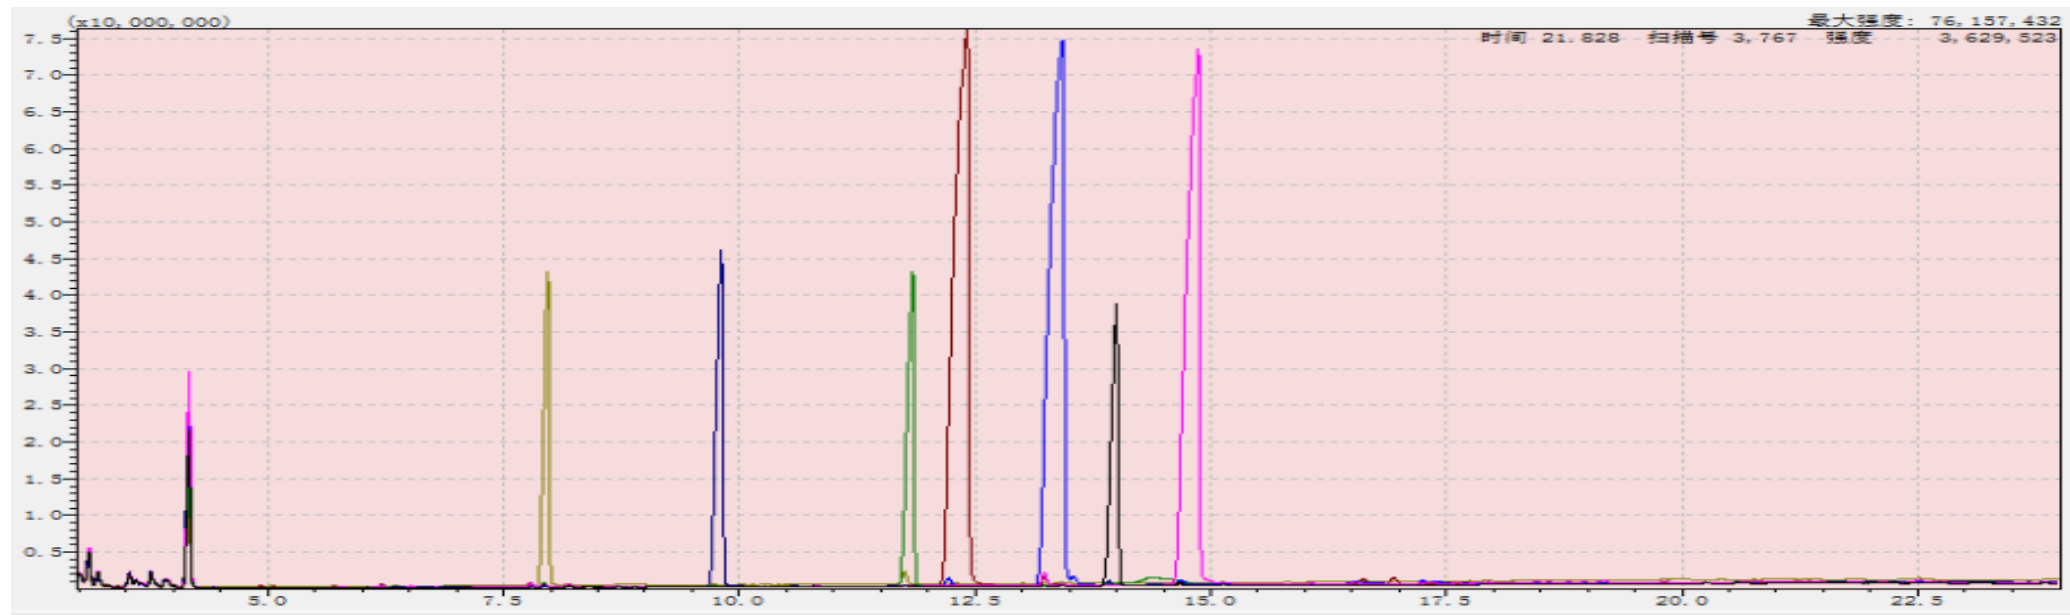

C16 C17 C18 C18:1 C18:2 C19 C18:3

b

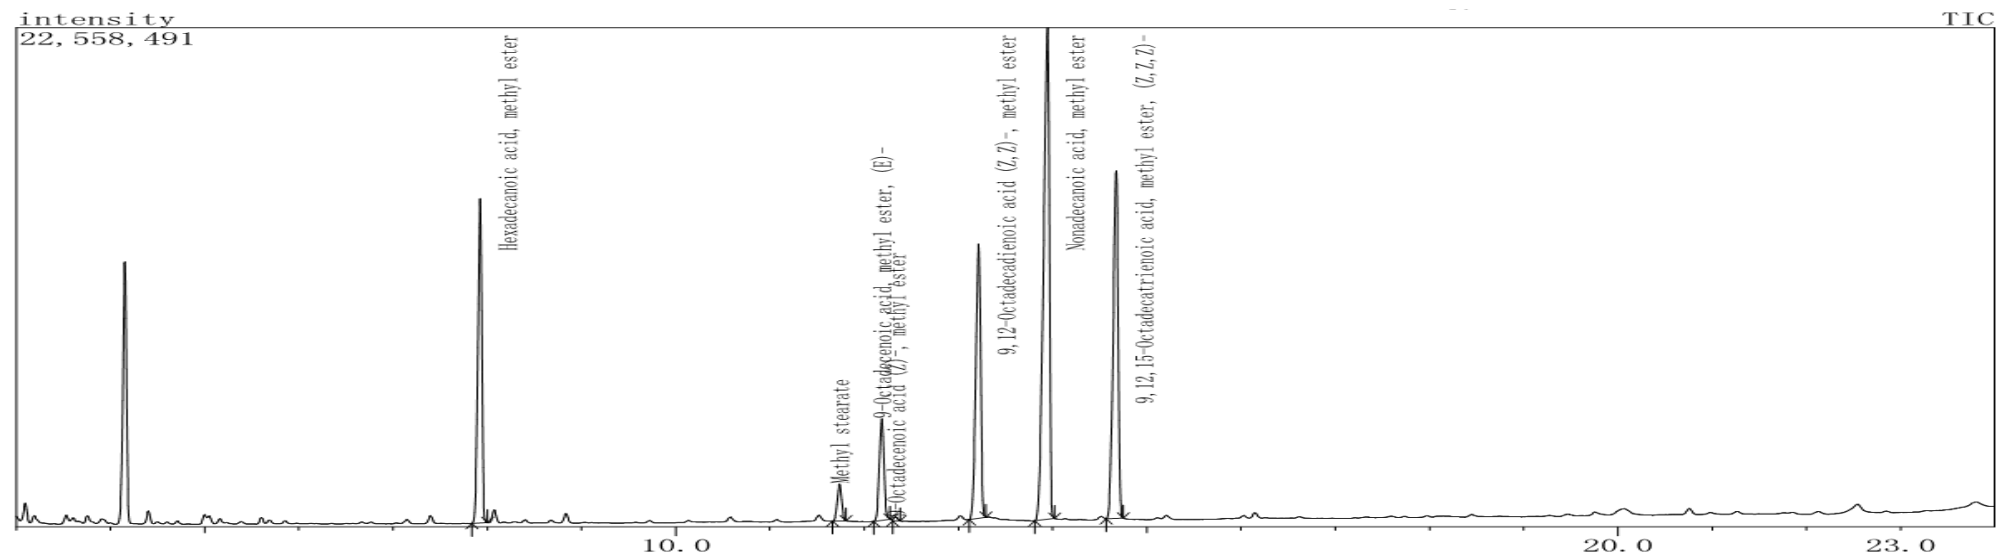

Fig. S5.



a

### Correlogram of all samples intercorrelations

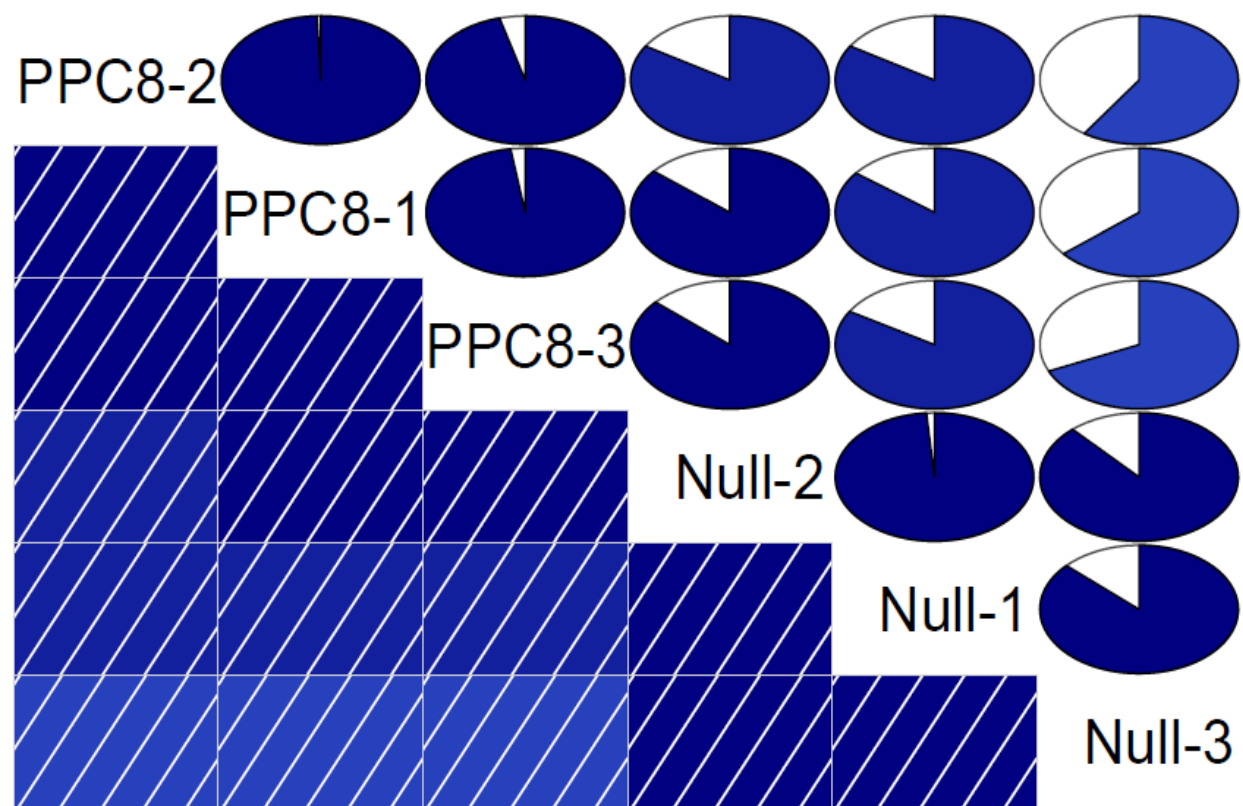

b

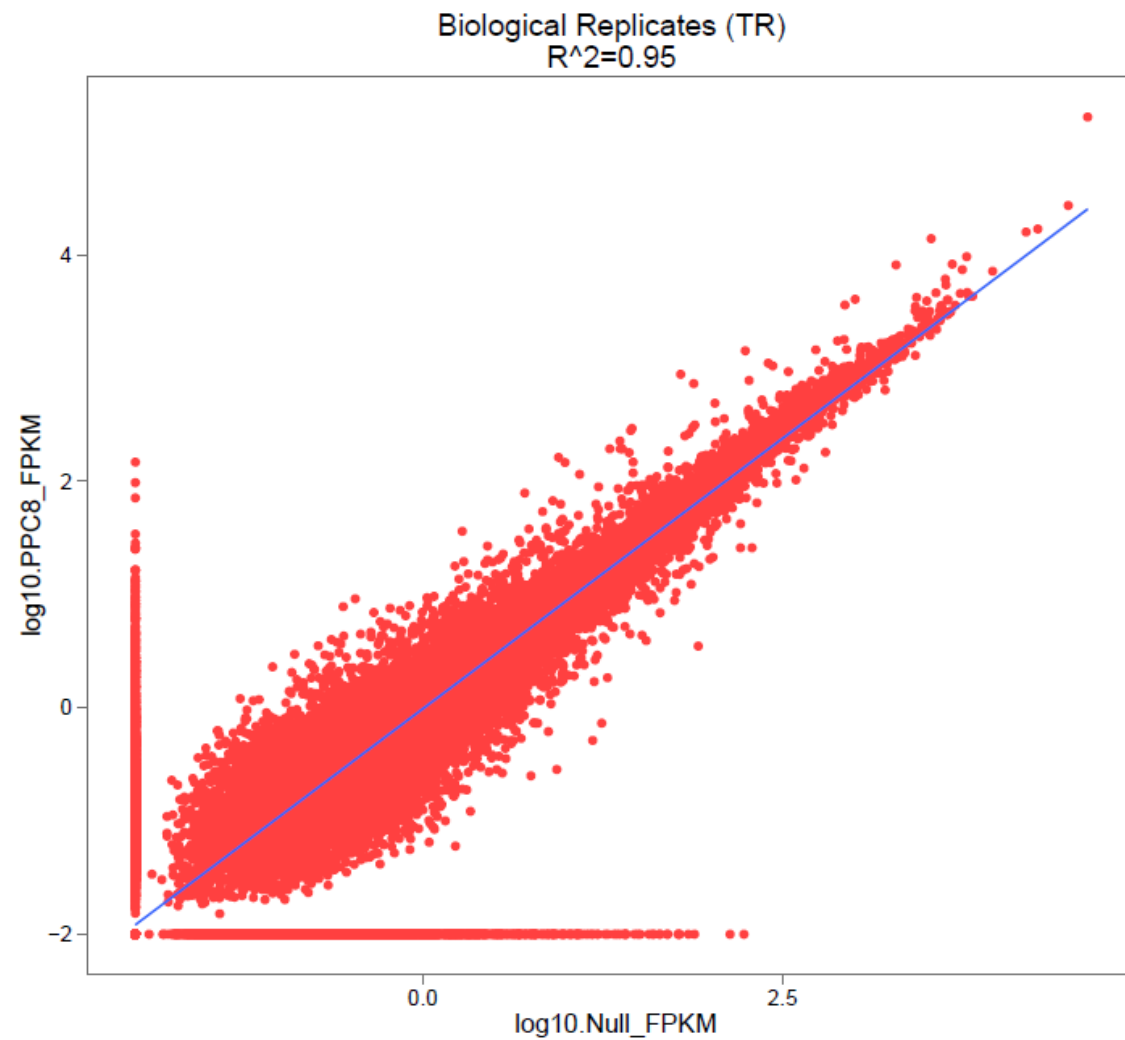

Fig. S6.

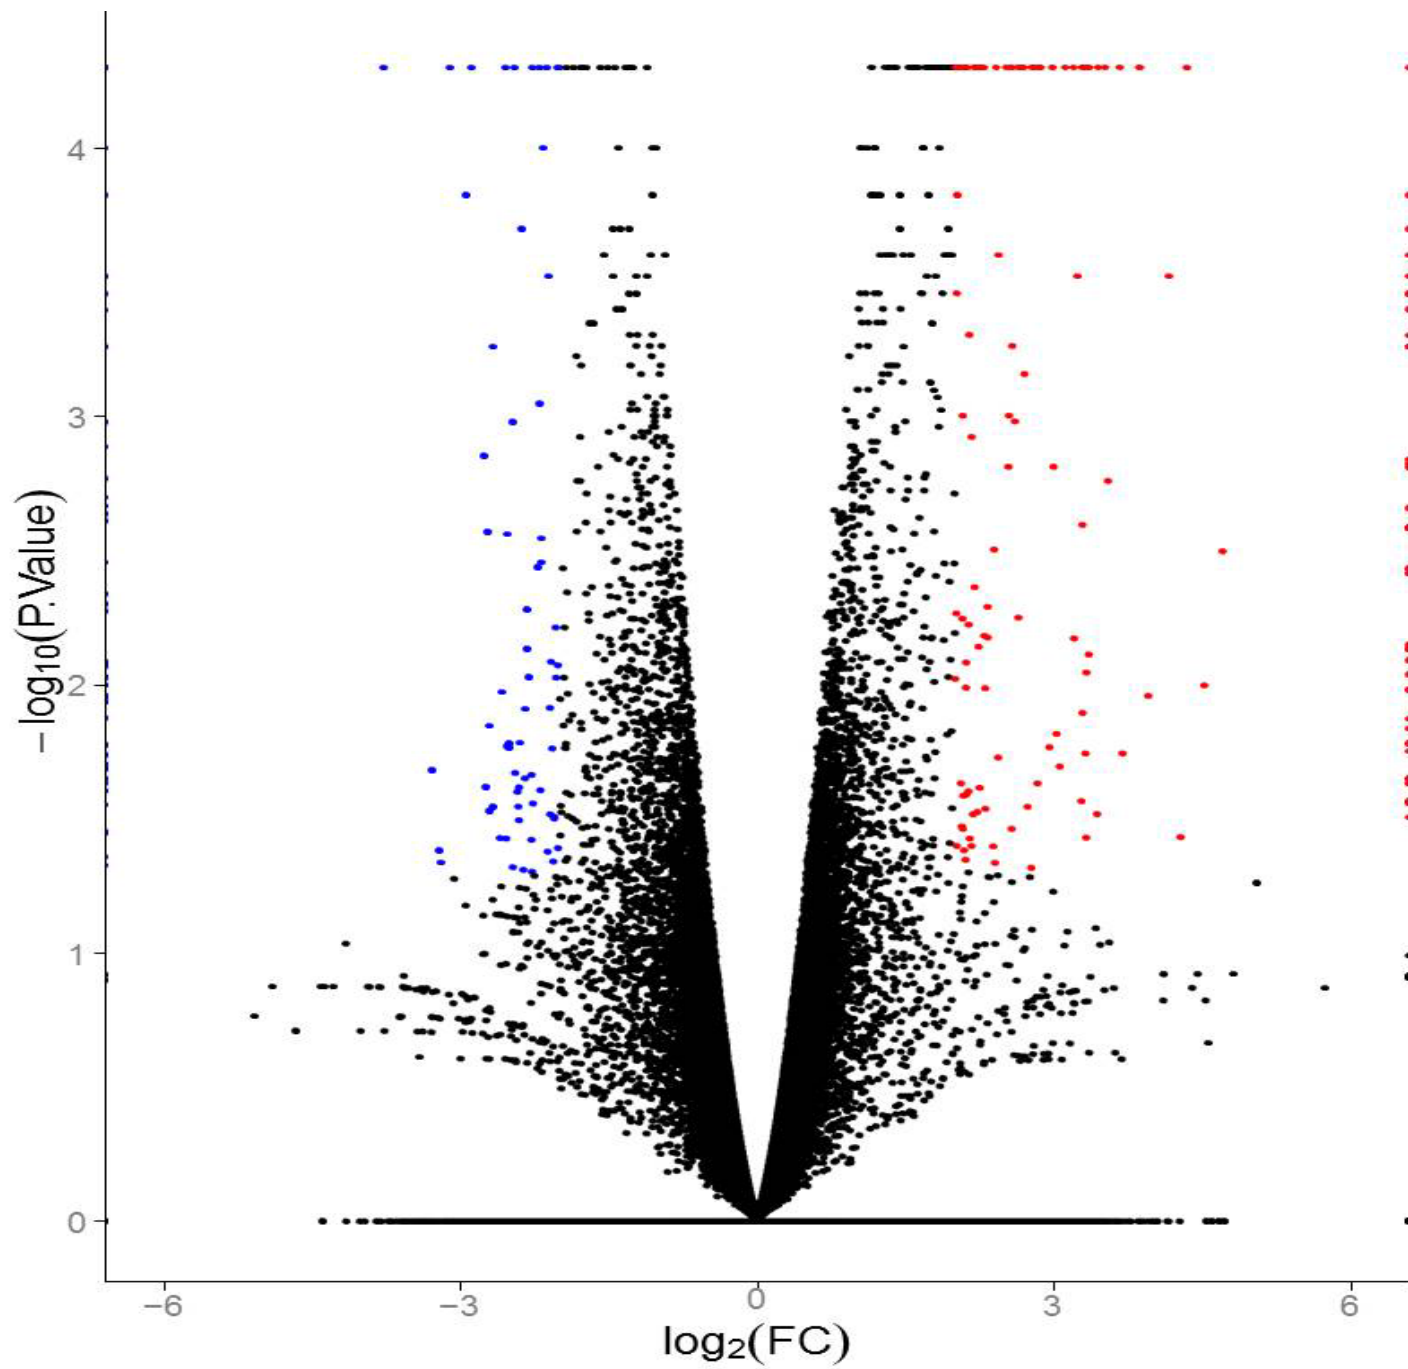

Fig. S7.

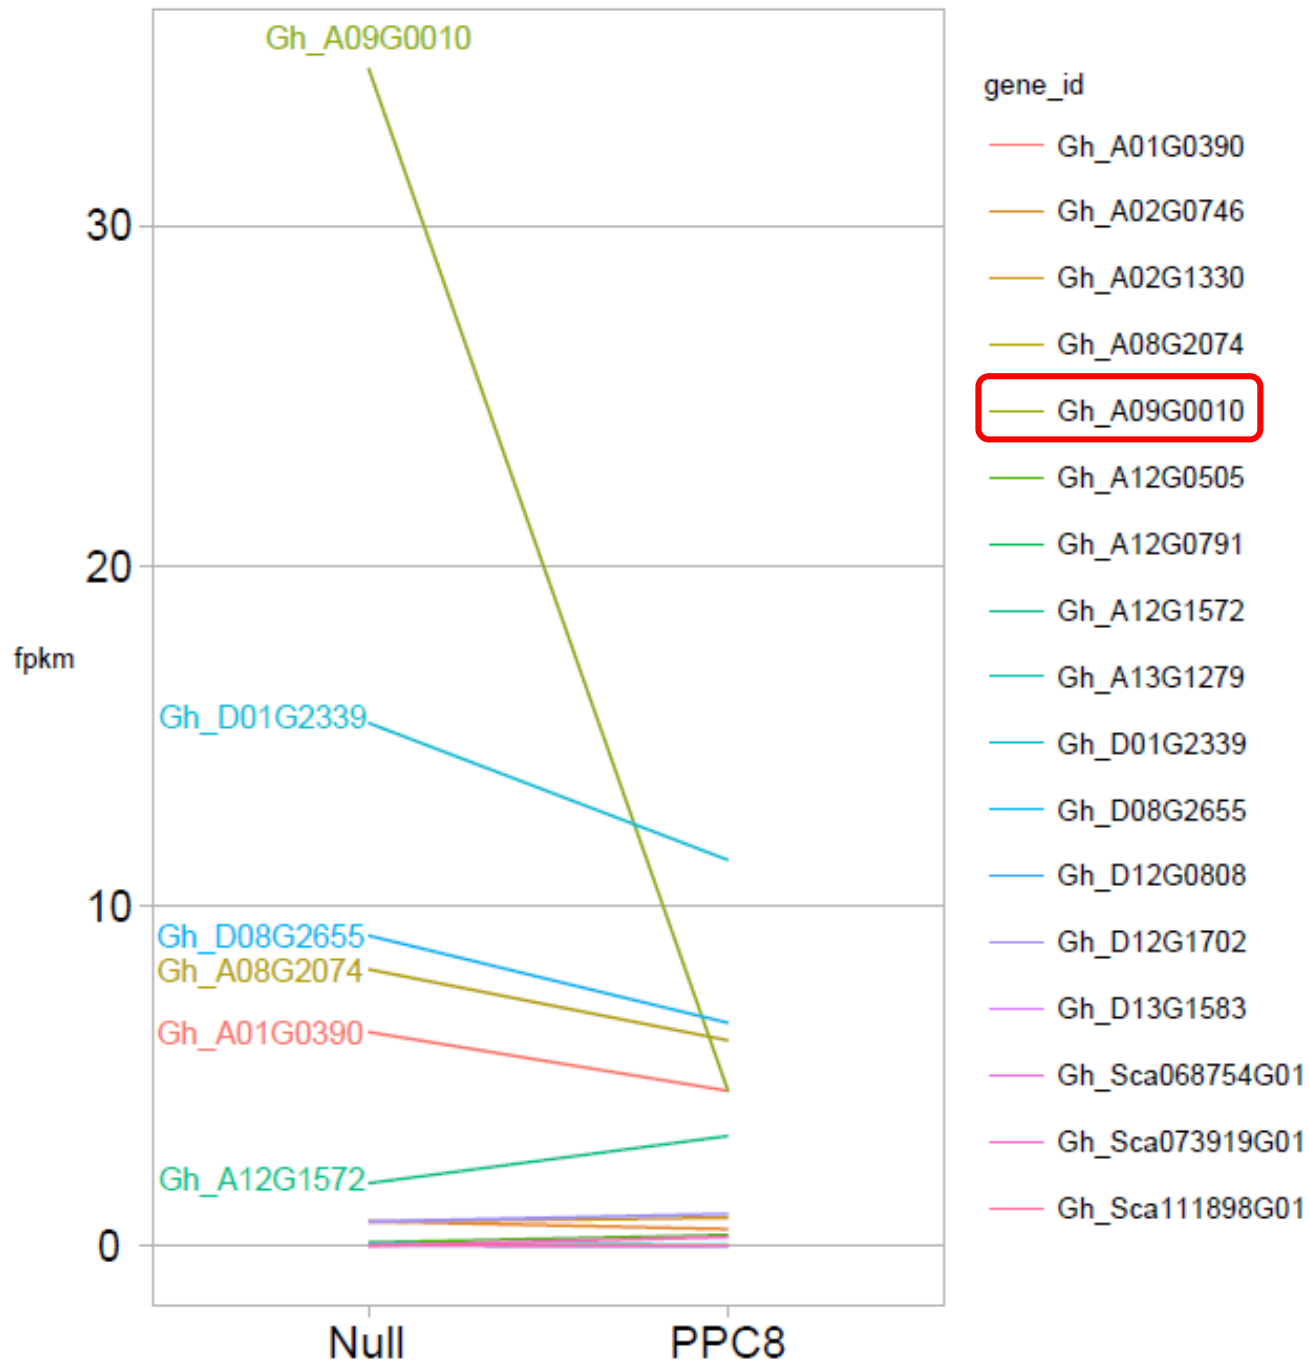

Fig. S8.

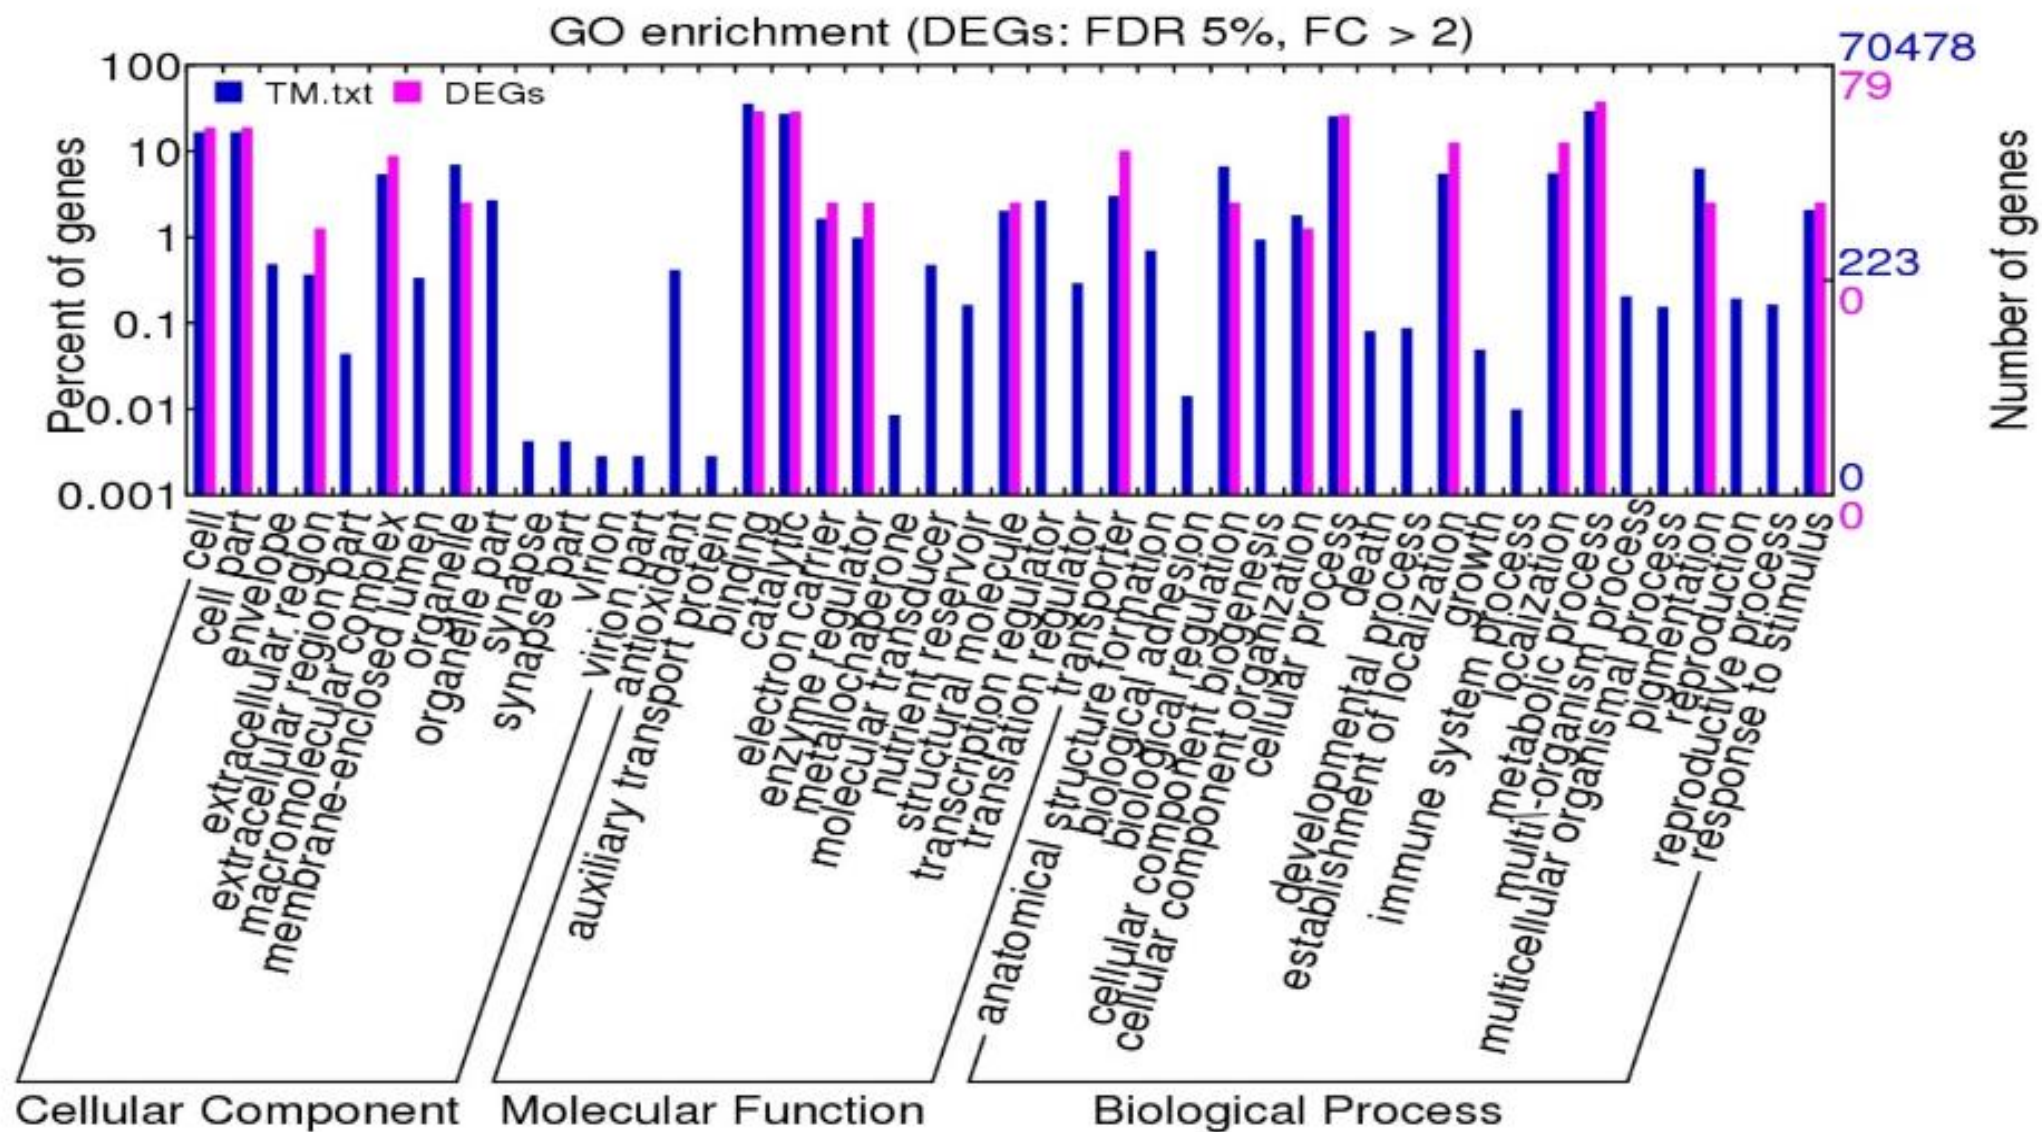

Fig. S9.

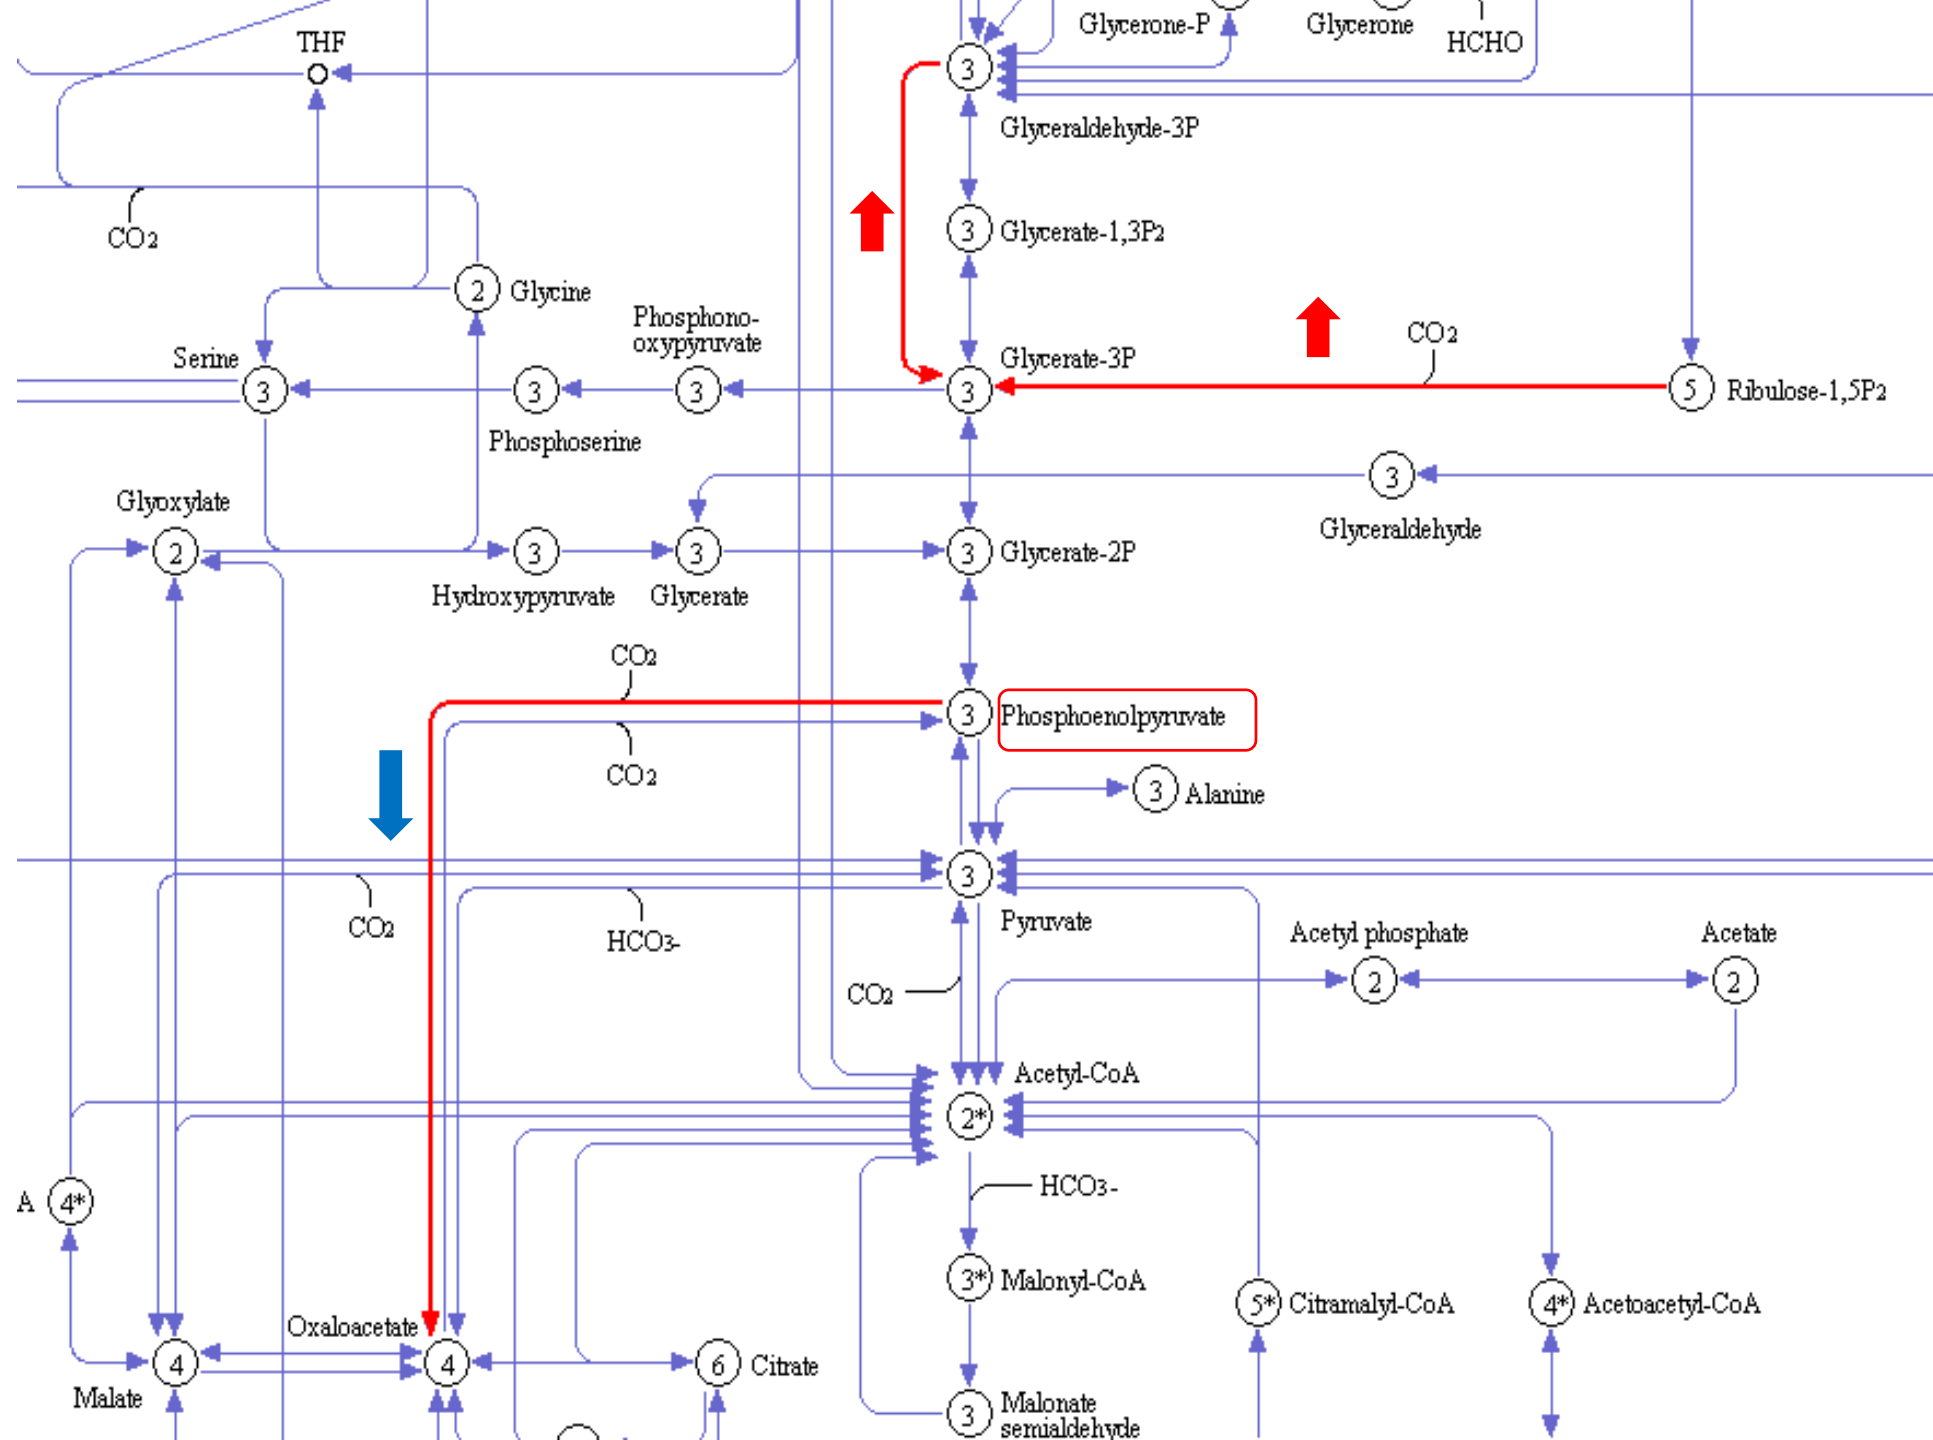

Fig. S10.



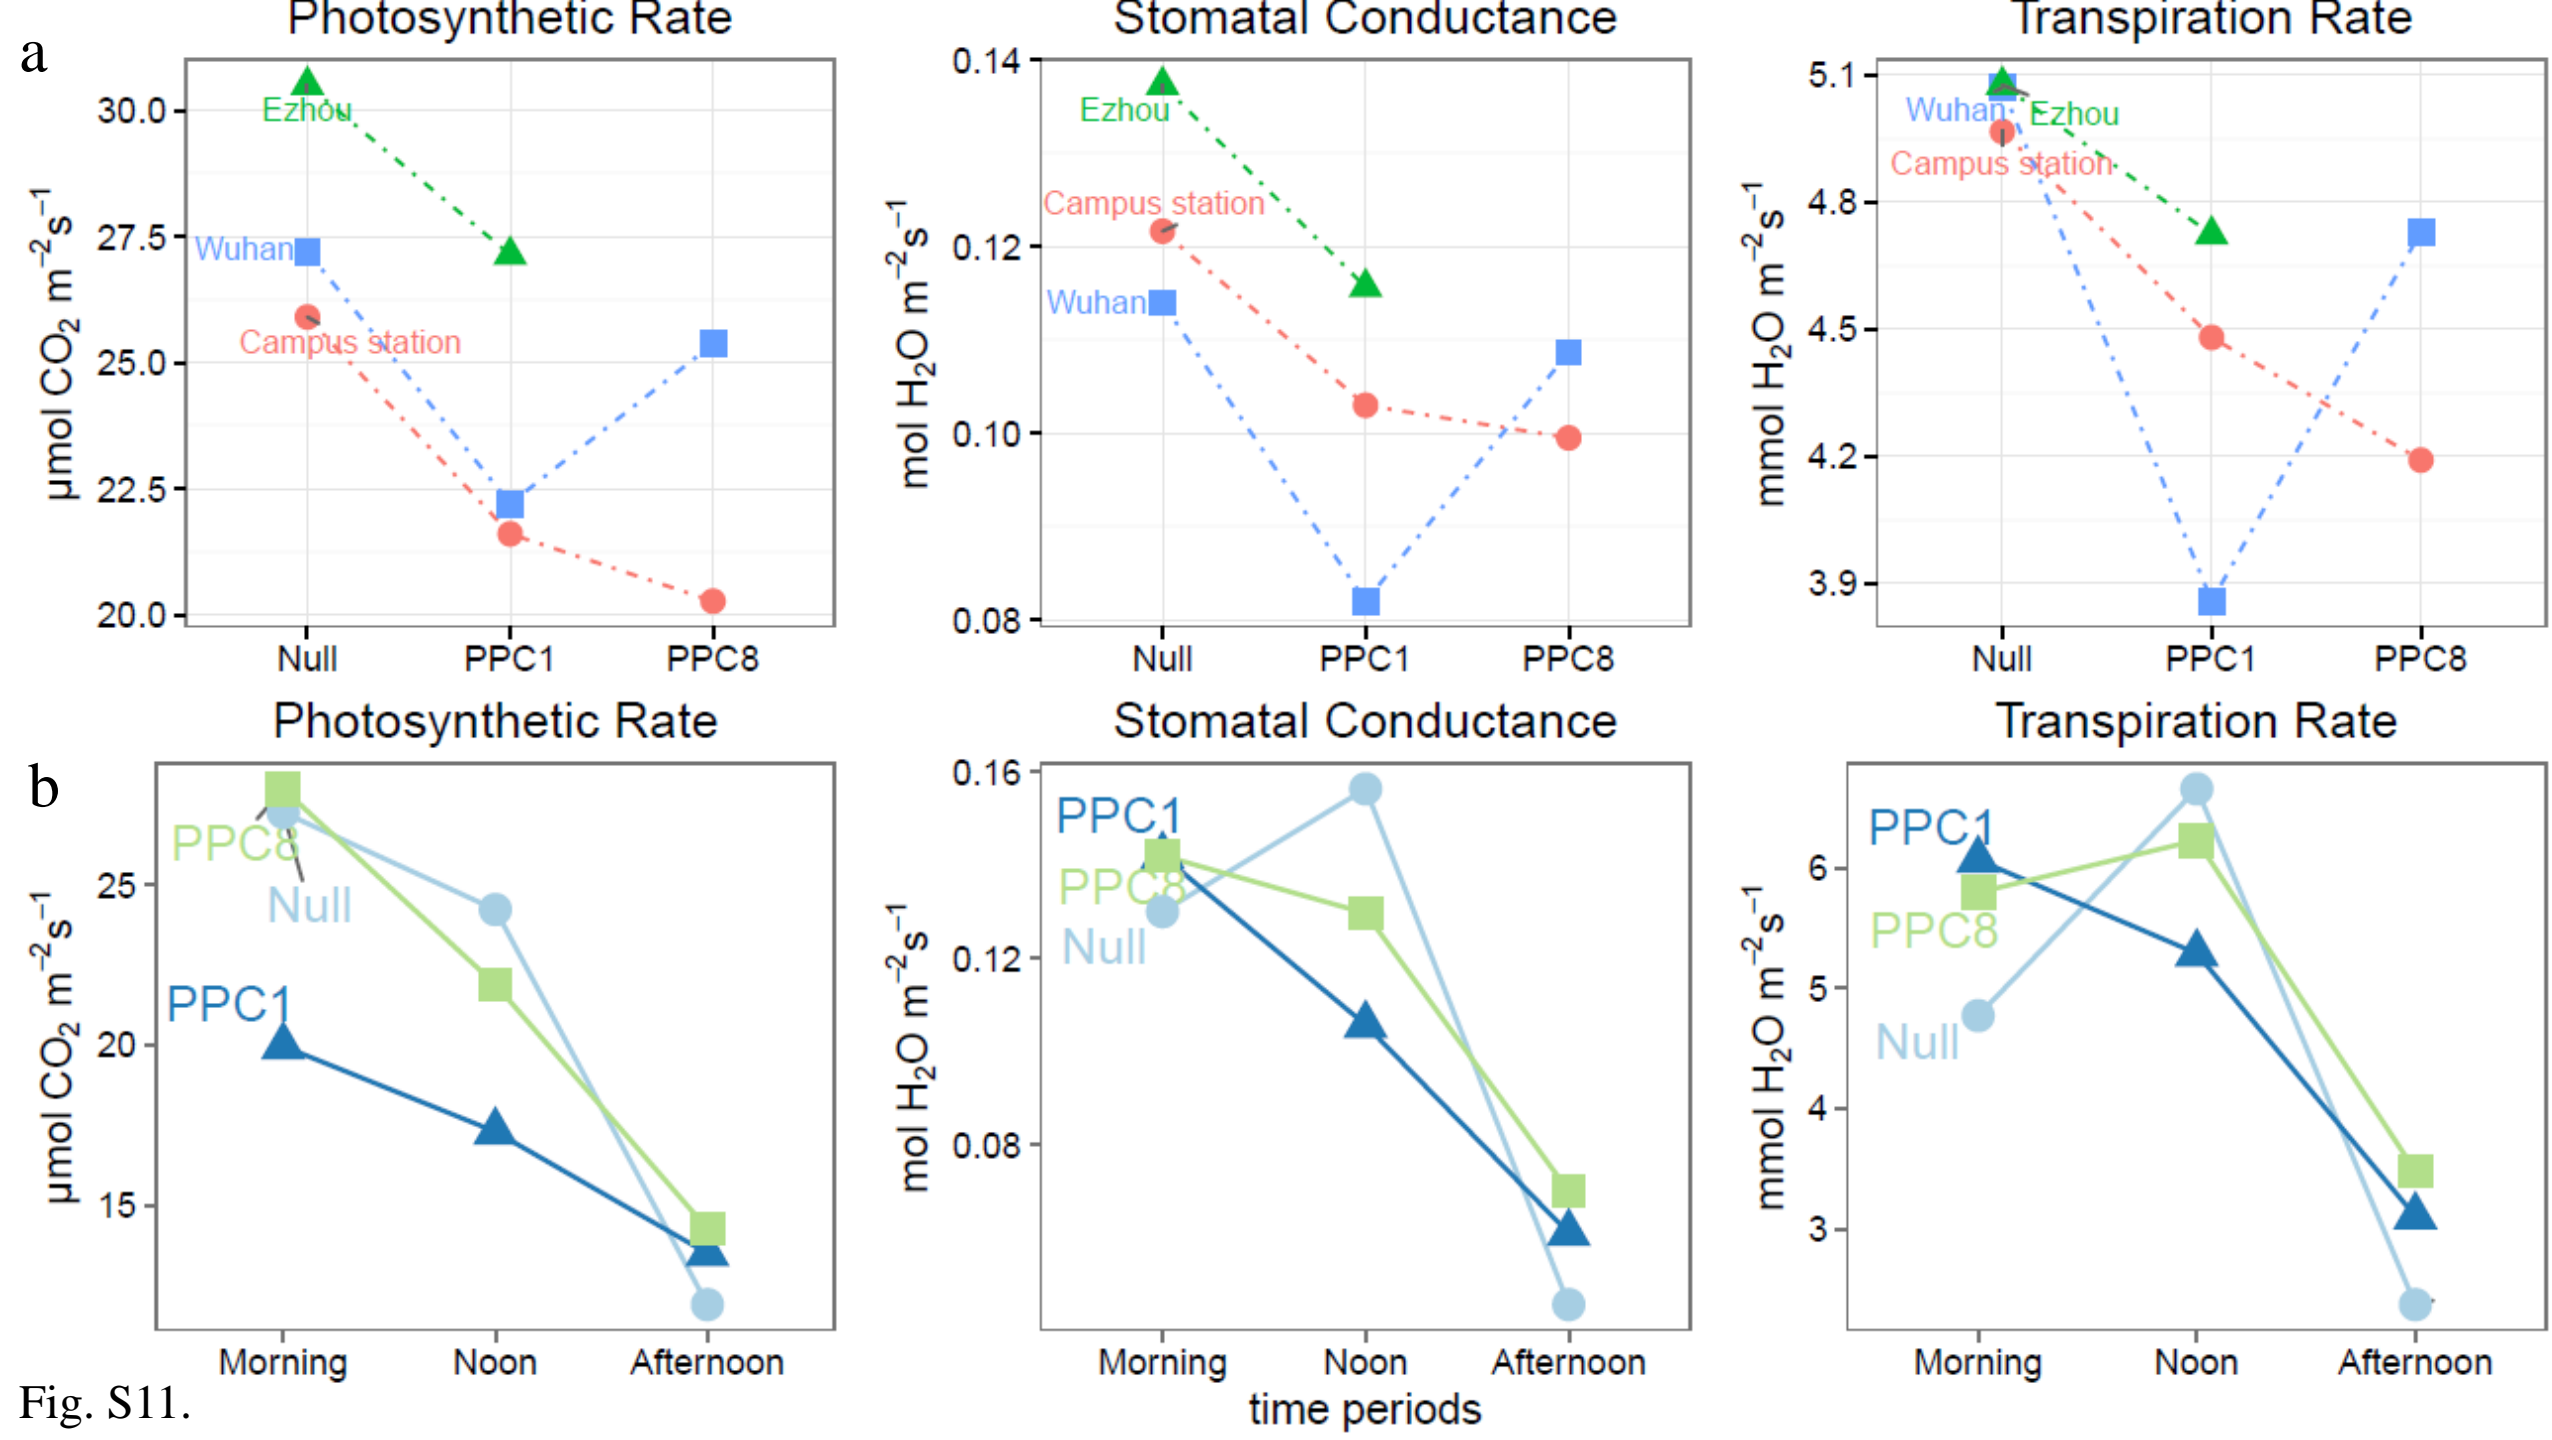



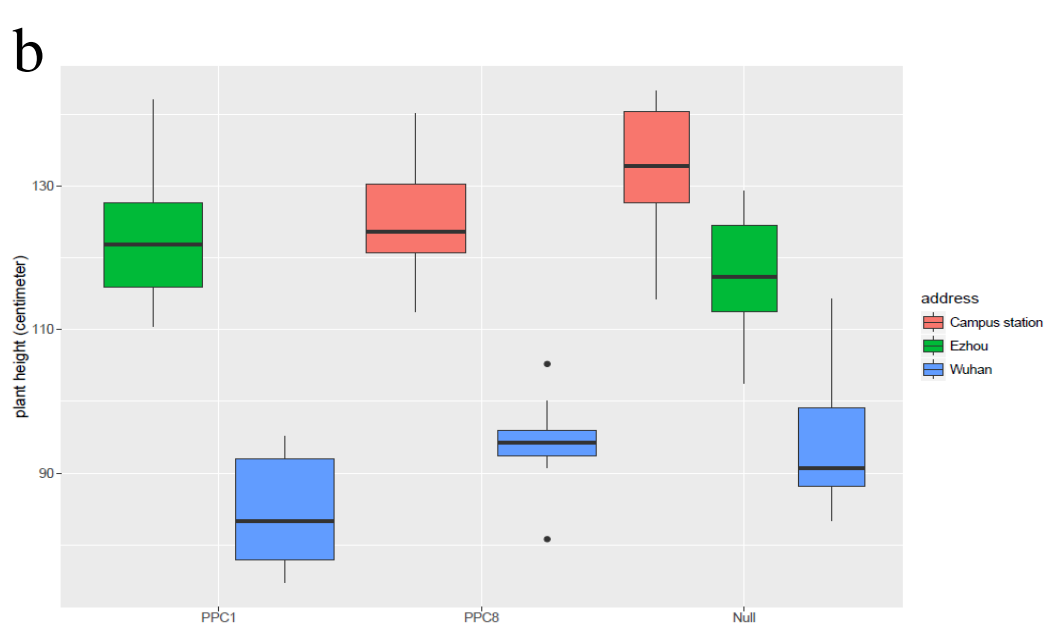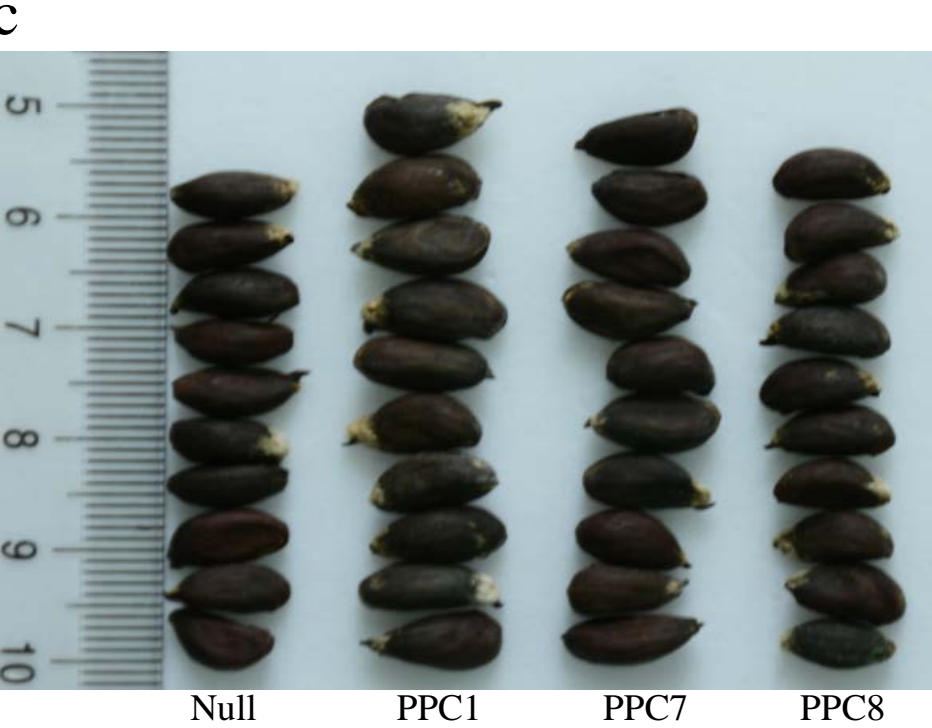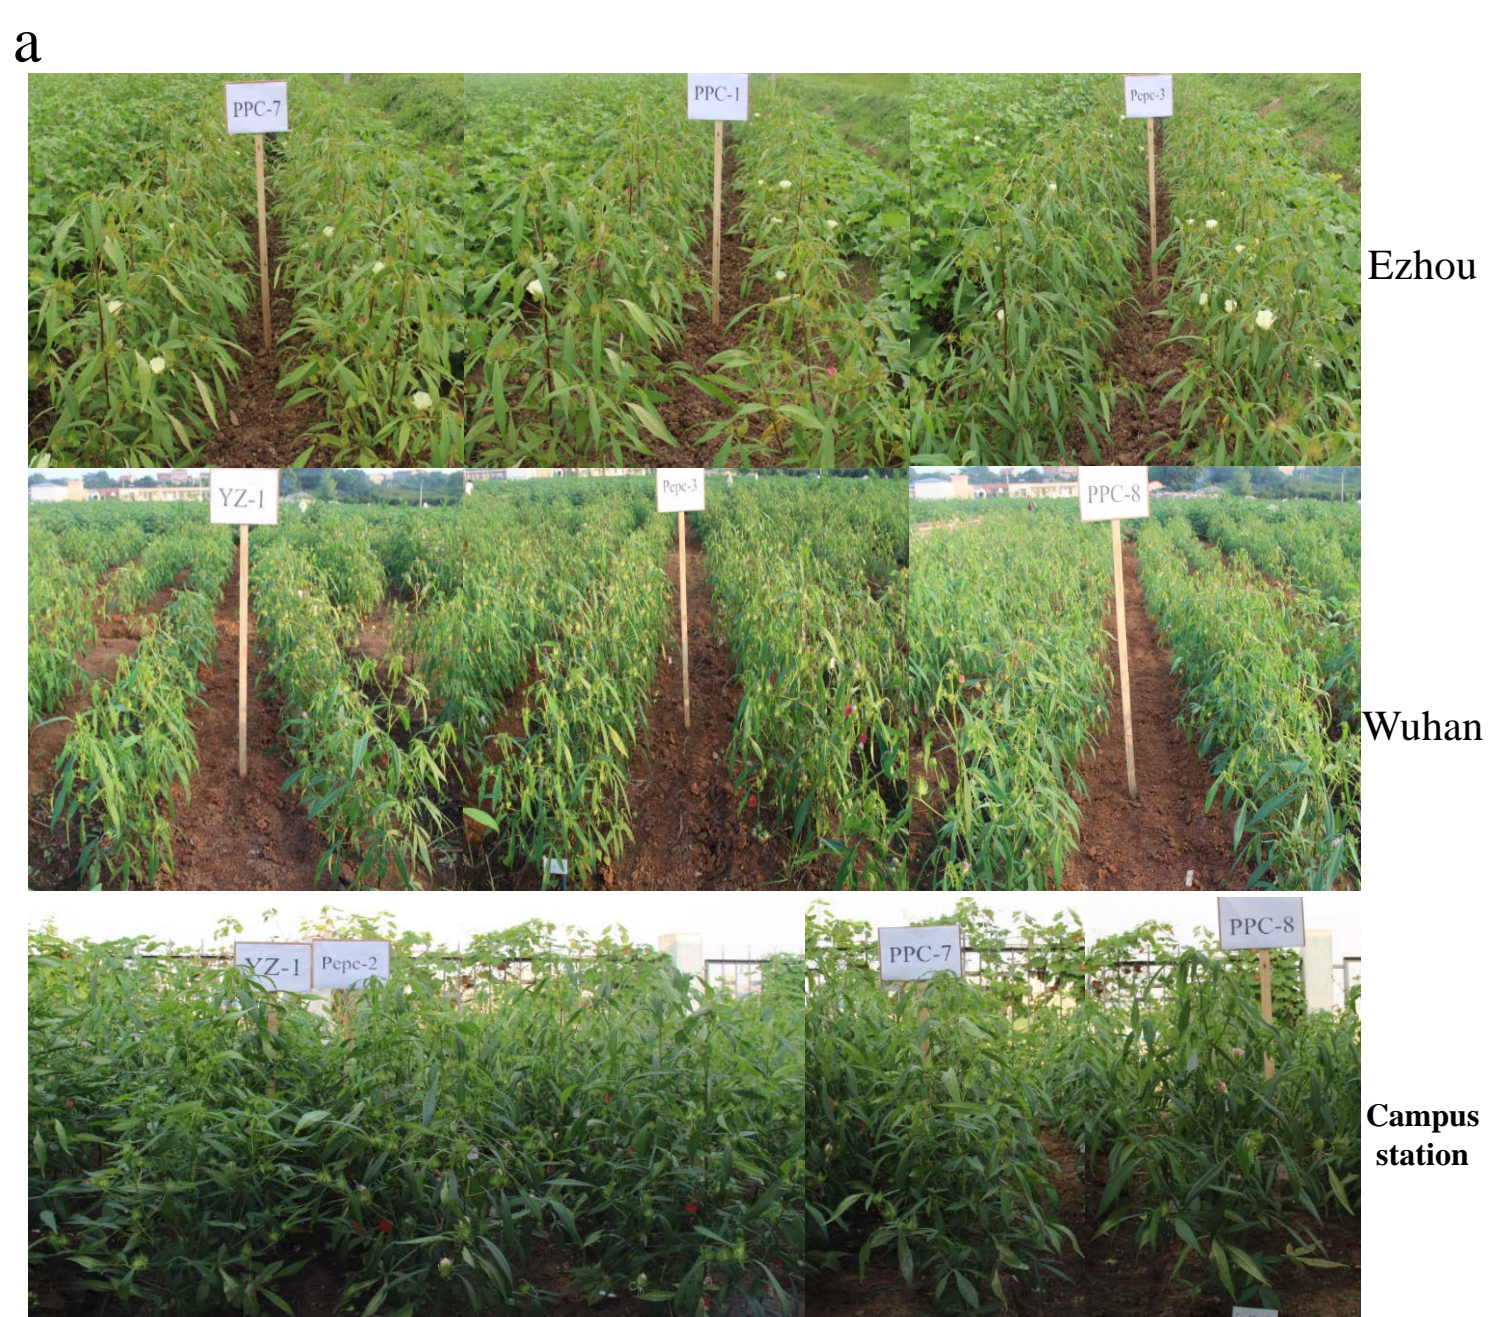

Fig. S12.

**a**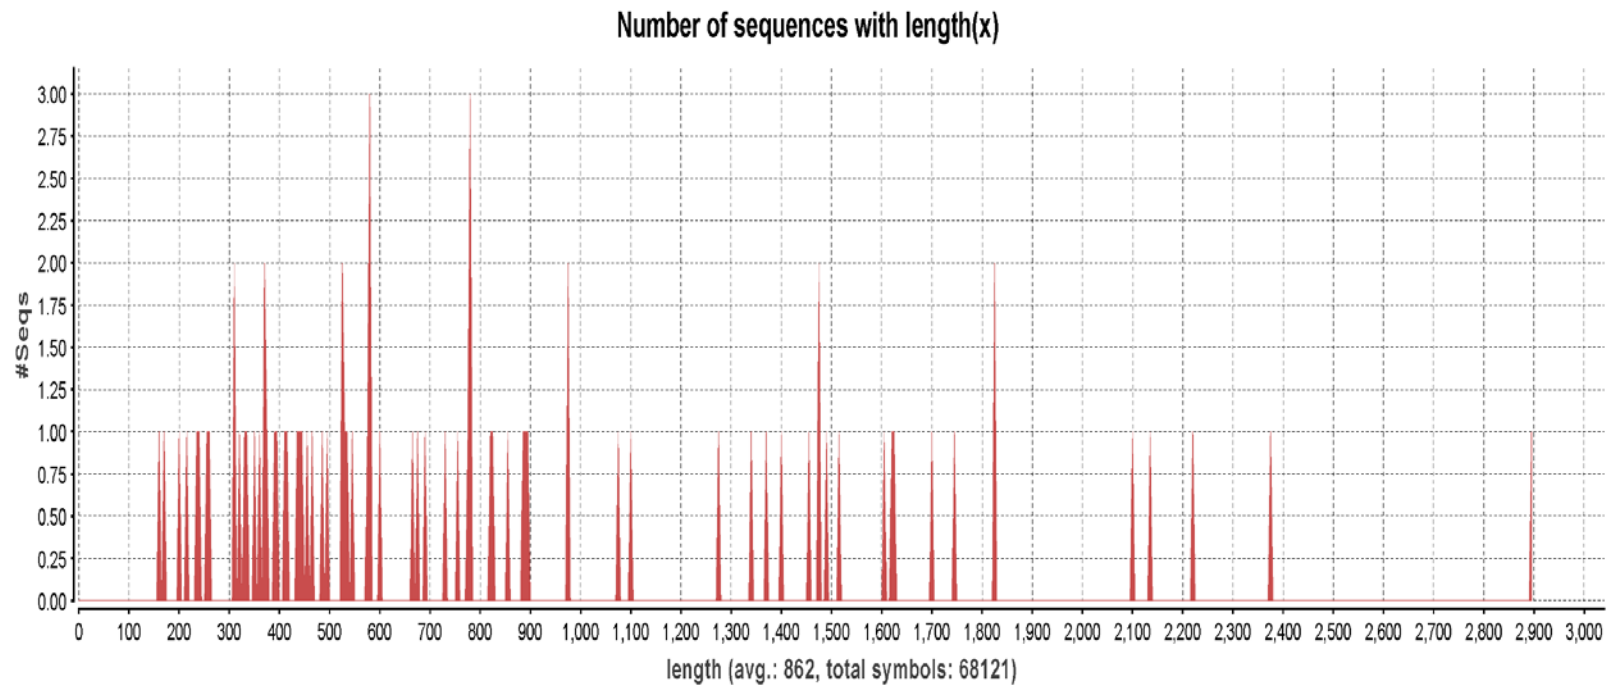**b**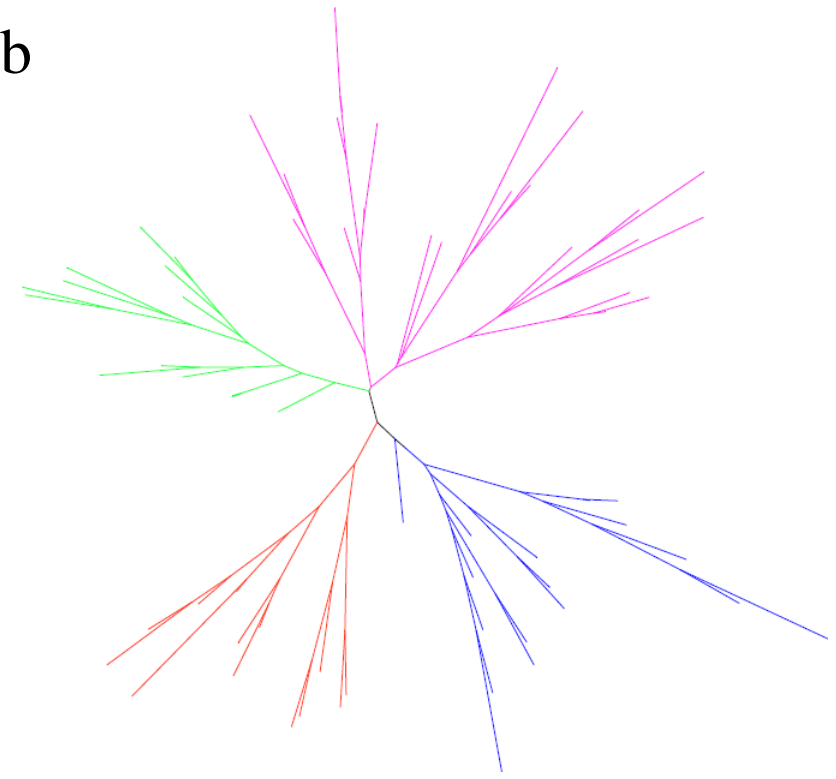

Fig. S13.

**Table S1. Summary of sequence read mapping**

| Sample | Reads   | Clean Reads | Mapped reads | Mapped Percent | Multiple Mapped reads | Multiple Mapped Percent | Pair Alignment Rate |
|--------|---------|-------------|--------------|----------------|-----------------------|-------------------------|---------------------|
| Null-1 | Reads_1 | 42310240    | 18658023     | 88.20%         | 2983161               | 16.00%                  | 77.30%              |
|        | Reads_2 |             | 17742882     | 83.90%         | 2740325               | 15.40%                  |                     |
| Null-2 | Reads_1 | 37065352    | 16456898     | 88.80%         | 2751402               | 16.70%                  | 77.60%              |
|        | Reads_2 |             | 15568456     | 84.00%         | 2510196               | 16.10%                  |                     |
| Null-3 | Reads_1 | 36017112    | 15700687     | 87.20%         | 2701833               | 17.20%                  | 77.00%              |
|        | Reads_2 |             | 15023946     | 83.40%         | 2512054               | 16.70%                  |                     |
| PPC8-1 | Reads_1 | 28632034    | 12751889     | 89.10%         | 3469177               | 27.20%                  | 74.60%              |
|        | Reads_2 |             | 12031429     | 84.00%         | 3155625               | 26.00%                  |                     |
| PPC8-2 | Reads_1 | 34142702    | 15283226     | 89.50%         | 3645873               | 23.90%                  | 76.20%              |
|        | Reads_2 |             | 14494268     | 84.90%         | 3343077               | 23.10%                  |                     |
| PPC8-3 | Reads_1 | 35370716    | 15743603     | 89.00%         | 4188521               | 26.60%                  | 75.50%              |
|        | Reads_2 |             | 14970131     | 84.60%         | 3860822               | 25.80%                  |                     |

**Table S2. Primers used in this study for qRT-PCR**

| Gene      | Primer Sequence               |
|-----------|-------------------------------|
| GhACC-F   | 5' CAGGCTTGATGTTTGGAGGGA 3'   |
| GhACC-R   | 3' TTTGGAAGTGCCTTTCGTTGAA 5'  |
| GhPEPC1-F | 5' GGCTCCGACTTCGTGATGCTTA 3'  |
| GhPEPC1-R | 3' TGGGATGTTCGCTCATACGAGGA 5' |



**Table S3. Chlorophyll content in transgenic lines of RNAi *GhPEPC1***

| Lines | Address | Campus station |      |                            | Wuhan       |      |                            |
|-------|---------|----------------|------|----------------------------|-------------|------|----------------------------|
|       |         | Mean (SPAD)    | SD   | P-value<br>$\alpha = 0.05$ | Mean (SPAD) | SD   | P-value<br>$\alpha = 0.05$ |
| PPC1  |         | 40.89          | 0.4  | **                         | 40.55       | 0.68 | *                          |
| PPC8  |         | 47.89          | 1.34 | –                          | 39.97       | 0.35 | *                          |
| Null  |         | 49.09          | 0.35 | –                          | 46.29       | 0.95 | –                          |
